1 **A Synthetic Transcription Platform for Programmable Gene Expression in Mammalian Cells**

2

3

**Short Title: Synthetic Transcription System for Mammalian Cells**

4

5 William C.W. Chen<sup>1,2,3,4,5,\*,&</sup>, Leonid Gaidukov<sup>1,3,\*</sup>, Yong Lai<sup>1,2,\*</sup>, Ming-Ru Wu<sup>1,#</sup>, Jicong Cao<sup>1</sup>, Michael  
6 J. Gutbrod<sup>6,7</sup>, Gigi C.G. Choi<sup>1,##</sup>, Rachel P. Utomo<sup>1,8</sup>, Ying-Chou Chen<sup>1,2,###</sup>, Liliana Wroblewska<sup>9</sup>,  
7 Manolis Kellis<sup>6,7</sup>, Lin Zhang<sup>10</sup>, Ron Weiss<sup>1,3</sup>, Timothy K. Lu<sup>1,2,3,&</sup>

8

9 <sup>1</sup> Synthetic Biology Center, Massachusetts Institute of Technology, Cambridge, MA, 02139, USA.

10 <sup>2</sup> Research Laboratory of Electronics, Massachusetts Institute of Technology, Cambridge, MA,  
11 02139, USA.

12 <sup>3</sup> Department of Biological Engineering, Massachusetts Institute of Technology, Cambridge, MA,  
13 02139, USA.

14 <sup>4</sup> Cardiovascular Research Center, Massachusetts General Hospital, Boston, MA 02114, USA.

15 <sup>5</sup> Division of Basic Biomedical Sciences, Sanford School of Medicine, University of South Dakota,  
16 Vermillion, SD, 57069, USA.

17 <sup>6</sup> Computer Science and Artificial Intelligence Laboratory, Massachusetts Institute of Technology,  
18 Cambridge, MA, 02139, USA.

19 <sup>7</sup> Broad Institute of Massachusetts Institute of Technology and Harvard University, Cambridge, MA,  
20 02139, USA.

21 <sup>8</sup> Department of Biochemistry, Wellesley College, Wellesley, MA 02481, USA

22 <sup>9</sup> Pfizer Inc., Cambridge, MA, 02139, USA

23 <sup>10</sup> Pfizer Inc., Andover, MA, 01810, USA

24 <sup>#</sup> Current address: Dana-Farber Cancer Institute and Harvard Medical School, Boston, MA 02215,  
25 USA

26 <sup>##</sup> Current address: Laboratory of Combinatorial Genetics and Synthetic Biology, School of  
27 Biomedical Sciences, The University of Hong Kong, Hong Kong, China

28 <sup>###</sup> Current address: Department of Life Sciences and Institute of Genome Sciences, National Yang-  
29 Ming University, Taipei, Taiwan

30

31 \* Authors with equal contributions

32 & To whom correspondence should be addressed: Timothy K. Lu, Tel: 617-715-4808, Email:  
33 [tim@lugroup.org](mailto:tim@lugroup.org); William C.W. Chen, Tel: 605-658-6321, Email: [William.Chen@usd.edu](mailto:William.Chen@usd.edu).

34

35

36 **Abstract** (150 words)

37 Precise, scalable, and sustainable control of genetic and cellular activities in mammalian cells is key  
38 to developing precision therapeutics and smart biomanufacturing. We created a highly tunable,  
39 modular, versatile CRISPR-based synthetic transcription system for the programmable control of  
40 gene expression and cellular phenotypes in mammalian cells. Genetic circuits consisting of well-  
41 characterized libraries of guide RNAs, binding motifs of synthetic operators, transcriptional activators,  
42 and additional genetic regulatory elements expressed mammalian genes in a highly predictable and  
43 tunable manner. We demonstrated the programmable control of reporter genes episomally and  
44 chromosomally, with up to 25-fold more activity than seen with the EF1 $\alpha$  promoter, in multiple cell  
45 types. We used these circuits to program the secretion of human monoclonal antibodies and to control  
46 T-cell effector function marked by interferon- $\gamma$  production. Antibody titers and interferon- $\gamma$   
47 concentrations significantly correlated with synthetic promoter strengths, providing a platform for  
48 programming gene expression and cellular function in diverse applications.

49

50

51

52 **Key Words:** Synthetic biology, synthetic gene circuit, CRISPR/Cas9, RNA-guided gene regulation,  
53 programmable gene expression, synthetic transcription factor, synthetic promoter, antibody  
54 production, immunotherapy, biomanufacturing, precision medicine

55

56

57

58

59

60

61

62

63

64

65

66

67

68

## 69 Introduction

70 The regulation of gene expression in complex organisms has been a central focus for characterizing  
71 disease variation [1], producing monoclonal antibodies (mAbs) [2], developing gene and cell therapies  
72 [3], and investigating other biological phenomena [4]. Synthetic biology offers powerful ways to  
73 harness artificial gene regulatory tools in mammalian systems [5-9]. For example, tumor-specific  
74 synthetic gene circuits applied to cancer immunotherapy yield significant anti-tumor responses in mice  
75 [10]. However, the use of strong constitutive promoters in gene expression platforms can increase the  
76 expression of target genes to the point of causing unwanted, dose-dependent side effects, raising  
77 safety concerns [11]. For instance, the use of the cytomegalovirus promoter (CMVp) to express a  
78 tumor-killing gene markedly increases apoptosis in normal cells and induces acute systemic toxicity  
79 *in vivo* [12]. Although promoter substitution is a simple and commonly implemented strategy for  
80 altering gene expression [13], optimizing cell type-specific or gene-specific natural promoters  
81 demands extensive effort [14]. Thus, controlling target gene expression with natural promoters has  
82 had only limited success in achieving desired biological phenotypes or therapeutic outcomes.

83 Another approach to regulating gene expression is to engineer transcription factors (TFs) and  
84 transcriptional activation domains (TADs) to control transcriptional activities [15]. Artificial transcription  
85 factors (aTFs), which can be rationally designed *in silico*, have been derived from zinc fingers (ZFs)  
86 [16], transcription activator-like effectors (TALEs) [17], and clustered regularly interspaced short  
87 palindromic repeats associated protein (CRISPR-Cas) [18, 19]. By conjugating DNA-binding proteins  
88 with various TADs, such as VP16 [20], VP64 [21], and VPR (VP64-p65-RTA) [22], researchers have  
89 demonstrated the utility of tuning promoter activity with aTFs. Particularly, CRISPR-based aTFs  
90 (crisprTFs) are simpler to customize and target to genomic loci of interest, using guide RNA (gRNA)  
91 with homology, than complex ZFs and TALEs; thus, crisprTFs are rapidly gaining popularity in  
92 biomedical research [23]. For example, several types of crisprTFs and compound activation mediators,  
93 based on deactivated CRISPR associated protein 9 (dCas), have been widely used in mammalian  
94 cells, such as dCas-VP64 [24], dCas-VPR, SunTag [25], and synergistic activation mediator (SAM)  
95 [26]. dCas-VPR, SunTag, and SAM can strongly activate genes in multiple species [27]. Our group  
96 has also developed crisprTFs to regulate gene expression driven by natural or artificial eukaryotic  
97 promoters [28].

98

99 Here, we build upon these aTF platforms by creating a comprehensive crisprTF promoter system for  
100 the programmable regulation of gene expression in mammalian cells. Our goal is to engineer a  
101 universal platform for tunable, scalable, and consistent transcriptional control in a wide variety of  
102 contexts, applicable to various cell types or target genes. Specifically, through mimicking natural  
103 mammalian promoters, we have created modular libraries of both crisprTFs and synthetic operators  
104 by: 1) altering gRNA sequences; 2) adjusting the number of gRNA binding sites (BS) in the synthetic  
105 operator; 3) incorporating additional control elements in the operator or crisprTF to augment

106 expression; and 4) designing multiple orthogonal crisprTFs. Because it implements a multi-tier gene  
107 circuit assembly design, this system has the advantage of operating at both epigenomic and genomic  
108 levels with precise tunability, versatile modularity, and high scalability.

109

110 To demonstrate the utility of this synthetic transcription platform, we first validated the precise control  
111 of two fluorescent reporter genes and then programmed the production of recombinant human mAbs,  
112 including a functional checkpoint antibody, anti-human programmed cell death protein 1 (anti-hPD1)  
113 [29]. High-yield, stable production was achieved by using crisprTF promoters within a recombinase-  
114 mediated, multi-landing pad (multi-LP) DNA integration platform [30]. Multi-LP DNA integration in  
115 genomic safe harbor loci (e.g., the Rosa26 locus) enables predictable single-copy integration, limited  
116 transgene silencing, stable gene expression, and consistent long-term protein production [30-32].  
117 Anti-hPD1 gene circuits expressed chromosomally with this system modulated certain anti-tumor  
118 phenotypes of human T cells. These results indicate that highly tunable, sustainable, and predictable  
119 protein expression over a wide dynamic range can be achieved with our scalable, modular synthetic  
120 transcription system.

121

## 122 **Materials and Methods**

### 123 **Molecular cloning and genetic circuit construction**

124 All genetic circuits in this study were constructed using a modular Gateway-Gibson assembly method  
125 [33, 34]. Briefly, gRNAs and related sequences were commercially synthesized (Integrated DNA  
126 Technologies IDT and GenScript) and then cloned into corresponding entry vectors using In-Fusion  
127 cloning (Takara Bio, San Jose, CA, USA) or a one-step Gibson reaction with the in-house master mix.  
128 Other genetic parts were cloned into corresponding entry vectors using the same approach. Multi-site  
129 LR reactions were performed between a promoter entry vector flanked by attL4 and attR1  
130 recombination sites, a gene entry vector flanked by attL1 and attL2 recombination sites, and  
131 pZDonor\_Seq(*n*)-GTW-Seq(*n*+1)\_R4\_R2 destination vectors containing a Gateway cassette  
132 (chloramphenicol resistance and ccdB genes flanked by attR4 and attR2 recombination sites) to  
133 generate positional expression vectors [i.e., independent transcriptional units (TUs) in different  
134 position vectors used for the subsequent Gibson assembly] [33]. Gibson reactions were performed  
135 with the Gibson Assembly Ultra Kit (SGI-DNA, La Jolla, CA, USA) at 50°C for 60 min, using equimolar  
136 concentrations (approximately 40-60 fmol per 10  $\mu$ L reaction) of column-purified positional expression  
137 vectors (cleaved with I-SceI), a matching adaptor vector (cleaved with XbaI and XhoI), and a carrier  
138 vector with BxB1-attB or BxB1-GA-attB integration sites (cleaved with FseI). Gibson-assembled  
139 constructs were diluted at 1:4 and used to transform *E. coli* 10G electrocompetent cells (60080-2,  
140 Lucigen, Middleton, WI, US). Cells were selected with appropriate antibiotics on solid and liquid  
141 culture; plasmids were column-purified with QIAprep Spin Miniprep Kit (27106, Qiagen, Hilden,  
142 Germany). After verification by restriction mapping analysis and Sanger sequencing of payload TUs,  
143 correctly assembled constructs were expanded in 25 mL liquid culture with Stbl3 chemically

144 competent cells (C737303, Invitrogen) and column-purified with QIAGEN Plasmid Plus Midi Kit  
145 (12945, Qiagen). A schematic diagram of the gene circuit construction methodology is shown in  
146 **Figure 1A**. Human elongation factor-1 alpha (EF1 $\alpha$ ) promoter and mouse CMVp were used as  
147 constitutive promoter controls. Sp-dCas9-VPR was a gift from George Church (Addgene plasmid  
148 63798) [22]. pRRL.CMVenh.gp91.Syn.Intron.eGFP was a gift from Didier Trono (Addgene plasmid  
149 30470), which was used for cloning the 230-bp synthetic intron sequence [35]. MS2-P65-HSF1\_GFP  
150 was a gift from Feng Zhang (Addgene plasmid 61423), which was used for cloning the MS2-P65-  
151 HSF1 sequence [26]. The sequences of genetic parts and the list of plasmids are provided in  
152 **Supplemental Table 1** and **Table 2**, respectively.

153

### 154 **Landing pad (LP) vector construction**

155 LP donor vectors for stable CRISPR-Cas9-mediated integration into the Chinese hamster ovary (CHO)  
156 cell genomes were constructed as previously reported [30]. Briefly, homology arm sequences for LP1-  
157 2, LP2, LP8, LP15, and LP20 sites (each arm approximately 0.5-1 kb long) were synthesized as a  
158 single gBlock (IDT) containing a PmeI restriction site between the left and right homology arms and  
159 unique BsaI cleavage sites in the 5' and 3' termini for Golden Gate cloning. Each gBlock was cloned  
160 into a pDTSmart vector modified to contain compatible BsaI cloning sites. LP cassettes containing  
161 hEF1 $\alpha$ -attP-BxB1-EYFP-P2A-Hygro (cassette 1), hEF1 $\alpha$ -attP-BxB1-EBFP-P2A-Bla (cassette 2), or  
162 hEF1 $\alpha$ -attP-BxB1-GA-EYFP-P2A-Hygro (cassette 3) were constructed using modular Gateway-  
163 Gibson cloning as previously described [33, 34]. LP cassettes were cloned into PmeI-linearized  
164 pDTSmart backbones between the left and right homology arms using In-Fusion cloning (Takara Bio  
165 USA). Using this approach, we generated the following LP donor vectors: LP1-2-cassette 1, LP2-  
166 cassette 1, LP2-cassette 2, LP8-cassette 2, LP15-cassette 2, LP20-cassette 2, and LP20-cassette 3  
167 [4, 30].

168 For human embryonic kidney (HEK)-293 cells, the LP donor vector was integrated into the AAVS1  
169 locus using engineered zinc finger nucleases (ZFN) as previously described [34]. Briefly, 800 bp  
170 homology arm sequences for the AAVS1 locus, on the 5' and 3' ends of the ZFN cut site, were cloned  
171 into flanking position vectors. A center position vector was assembled to encode a double cHS4 core  
172 insulator, the CAG promoter, *attP* BxB1, EYFP-2A-Hygromycin, a rabbit beta-globin polyadenylation  
173 signal, and another double cHS4 core insulator. These three position vectors were verified and then  
174 assembled into the LP Shuttle Vector. A DNA fragment encoding the two DNA-binding ZF domains for  
175 the AAVS1 locus, separated by a 2A self-cleavage peptide sequence, was synthesized (GeneArt,  
176 Regensburg, Germany) and cloned into an expression vector with CAG promoter via Gateway  
177 assembly to create the ZFN-expressing vector.

178

### 179 **Cell culture and plasmid transfection**

180 Adherent wild-type CHO-K1 cells (CCL-61, ATCC) and engineered CHO cells were maintained in  
181 complete HAMS-F12 (cHAMS-F12) medium (ATCC) containing 10% fetal bovine serum (FBS)

182 (Sigma-Aldrich), 1% HyClone non-essential amino acids (GE Healthcare Life Sciences), and 1%  
183 penicillin/streptomycin (P/S) (Gibco by Life Sciences). Cells were grown in a humidified 37°C  
184 incubator with 5% CO<sub>2</sub> and passaged every 2-3 days. Transfections were carried out with the Neon  
185 electroporation system (Invitrogen) with 10 µl Neon tips. Briefly, 1x10<sup>5</sup> cells were suspended in R  
186 buffer and mixed well with 250 ng of individual experimental and transfection marker plasmids for 10-  
187 15 min at room temperature (RT). To ensure that all samples had the same total amount of plasmids,  
188 we supplemented the negative or positive control samples with a dummy plasmid composed of an  
189 identical expression vector backbone and a non-functional insert sequence. Cells were then  
190 electroporated with the setting of 1560 V/5 ms/10 pulses. Transfected cells were immediately  
191 transferred to a 24-well plate containing 1 mL complete culture medium without any anti-microbial  
192 reagents. Fluorescence-activated cell sorting (FACS) analysis was performed at 48 hours post-  
193 transfection. Experiments were performed with independently transfected biological triplicates.

194 HEK-293T cells (CRL-3216), mouse C2C12 myoblasts (CRL-1772), and rat H9c2 cardiac myoblasts  
195 (CRL-1446) were purchased from ATCC. All three cell types were thawed and expanded according to  
196 the manufacturer's instructions and subsequently maintained in Dulbecco's Modified Eagle medium  
197 (DMEM; 10569-044, Thermo Fisher Scientific, Waltham, MA, USA ) containing 10% FBS and 1% P/S.  
198 Transfections were carried out with ViaFect transfection reagent (E4982, Promega, Madison, WI,  
199 USA). Briefly, cells were washed once with PBS, trypsinized, and re-suspended with complete culture  
200 medium at 1x10<sup>5</sup> cells per 100 µL. Experimental and transfection marker plasmids (250 ng each) were  
201 added to 100 µL plain Opti-MEM medium and mixed well with ViaFect at a 1:3 ratio (total DNA by  
202 weight: ViaFect by volume), according to the manufacturer's recommendation. After incubating at RT  
203 for 10 min, 1x10<sup>5</sup> cells were added to the plasmid/ViaFect mixture and mixed well. Transfected cells  
204 were immediately transferred to a 24-well plate containing 0.8 mL complete culture medium without  
205 any antimicrobial reagents. FACS analysis was performed at 48 hours post-transfection.

206 The PGP1 human induced pluripotent stem cells (hiPSCs) were cultivated under sterile conditions  
207 [36]. Briefly, tissue culture plates were coated with Matrigel Matrix (354277, Corning Inc., Corning, NY,  
208 USA), following the manufacturer's protocol, and incubated for at least 1 hour at 37°C prior to plating.  
209 hiPSCs were cultured in StemFlex medium (A3349401, Thermo Fisher Scientific), split with a five-  
210 minute treatment of StemPro Accutase (A1110501, Thermo Fisher Scientific) at 37°C every 3-4 days,  
211 and plated on Matrigel-coated plates at an appropriate density with ROCK inhibitor (1254, Tocris  
212 Bioscience, UK) at a final concentration of 10 µM for 24 hours to improve viability. hiPSCs were  
213 reverse transfected with plasmids using Lipofectamine Stem transfection reagent (STEM00001,  
214 Thermo Fisher Scientific) and Opti-MEM (31985088, Thermo Fisher Scientific) in 12-well plates in  
215 triplicate according to the manufacturer's recommended protocol. Briefly, cells were cultured until they  
216 reached 40-50% confluence at transfection. Experimental and transfection marker plasmids (250 ng  
217 each) were added to 25 µL plain Opti-MEM I medium and mixed with 25 µL diluted Lipofectamine  
218 Stem transfection reagent (1:1 ratio), following the manufacturer's protocol. After incubating at RT for  
219 10 min, 50 µL DNA-lipid complexes were applied to each well. At 48 hours post-transfection with

220 ~ $1 \times 10^5$  cells per well, hiPSCs were harvested with StemPro Accutase, washed three times with PBS  
221 (100100023, Thermo Fisher Scientific), subjected to filtration with a 35-micron cell strainer, and then  
222 run on a flow cytometer for FACS analysis.

223

### 224 **Engineering landing pad cells**

225 Single- and multi-LP CHO cell lines with engineered LP1-2, LP2, LP8, LP15, and LP20 loci were  
226 constructed in adherent CHO-K1 cells by homologous recombination with CRISPR/Cas9 as  
227 described [30]. Briefly, targeted integrations were performed by co-transfecting 500 ng of circular LP  
228 donor vector with 40 ng of px330-U6-chimeric\_BB-CBh-hSpCas9 vector, a gift from Feng Zhang  
229 (Addgene plasmid 42230) [37], and 150 ng of U6-gRNA GeneArt DNA String (ThermoFisher). Roughly  
230  $10^5$  cells were transfected in triplicate with the Neon electroporation system with 10  $\mu$ l Neon tips and  
231 seeded in 24-well plate. Cells were then transferred to a six-well plate at 3 days post-transfection and  
232 subjected to antibiotic selection with either hygromycin (600  $\mu$ g/ml) or blasticidin (10  $\mu$ g/ml) for two  
233 weeks, followed by clonal cell sorting with FACS. Clonal cells were verified with diagnostic PCR using  
234 locus-specific and LP-specific primers (for on-target integration) and backbone-specific primers (for  
235 off-target integration). Single-cell clones exhibiting locus-specific and backbone-free integration, as  
236 well as stable and homogenous LP expression, were expanded, banked, and subsequently used for  
237 gene circuit integration.

238 The single-LP HEK293 cell line was constructed with an engineered AAVS1 locus by homologous  
239 recombination with ZFN in wild-type adherent HEK293 cells as described [34]. Briefly, HEK293 cells  
240 were co-transfected with equimolar amounts of the ZFN-expressing vector and the LP Shuttle Vector,  
241 allowed to recover for 72 hours, and then selected with 200  $\mu$ g/ml hygromycin for 2 weeks. Single-  
242 cell clones exhibiting locus-specific integration and stable LP expression were generated by serial  
243 dilutions of the surviving population and subsequently expanded for gene circuit integration.

244

### 245 **Chromosomal integration of gene circuits**

246 For chromosomal integration of gene circuits in adherent, engineered CHO and HEK293 cells, cells  
247 were independently transfected in triplicate with 500 ng of the BxB1 integrase-expressing plasmid  
248 (pEXPR-CAG-BxB1) and 500 ng DNA of the payload plasmid, using the Neon electroporation system  
249 with the same setting as described above. Transfected cells were immediately transferred to a 24-  
250 well plate containing 1 mL complete culture medium per well without any antimicrobial reagents. At 3  
251 days post-transfection, cells were transferred to a 6-well plate with 3 mL complete culture medium per  
252 well, followed by one of the following one-time cell selection strategies (depending on the individual  
253 payload construct designs described in the Results section and figures): 1) for single integrants in  
254 single LP (sLP), cells were selected with puromycin only (8  $\mu$ g/ml for CHO and 1  $\mu$ g/ml for HEK293)  
255 for gene circuits with a single selection marker, or with both puromycin (8  $\mu$ g/ml) and blasticidin (10  
256  $\mu$ g/mL) for gene circuits with both selection markers; 2) for single integrants in double LP (dLP), cells  
257 were selected with either puromycin (8  $\mu$ g/mL) alone or with hygromycin (250  $\mu$ g/mL) and G418 (250

258  $\mu\text{g}/\text{mL}$ ) for the payload integrated in the LP2 locus, and with blasticidin ( $10 \mu\text{g}/\text{mL}$ ) for the non-  
259 integrated, empty LP15 locus; 3) for double integrants in dLP, cells were selected with puromycin ( $8$   
260  $\mu\text{g}/\text{mL}$ ), blasticidin ( $10 \mu\text{g}/\text{mL}$ ), hygromycin ( $250 \mu\text{g}/\text{mL}$ ), and G418 ( $250 \mu\text{g}/\text{mL}$ ). Following 10 days  
261 of selection, correct integration was confirmed by FACS, indicated by the complete disappearance of  
262 native LP fluorescence: either enhanced yellow fluorescent protein (EYFP), or enhanced blue  
263 fluorescent protein (EBFP), or both. Cells with chromosomally integrated gene circuits were  
264 maintained as pooled populations after selection. Cell viability and density were monitored with a Vi-  
265 CELL automated cell viability analyzer (Beckman-Coulter).

266

### 267 **Fluorescent imaging**

268 All fluorescent images were taken with the EVOS FL Auto cell imaging system equipped with multiple  
269 LED light cubes, including TagBFP, GFP, YFP, RFP, and Texas Red (Thermo Fisher Scientific).  
270 Fluorescent images of the same color were taken with the same exposure settings. Scale bars were  
271 directly printed in the images.

272

### 273 **Flow cytometry and cell sorting**

274 Cells were analyzed with a LSRFortessa flow cytometer, equipped with 405, 488, and 561 nm lasers  
275 (BD Biosciences). Thirty thousand events per sample were collected for analysis of median signal  
276 intensity of the transfected population, using a 488 nm laser and 530/30 nm bandpass filter for EYFP  
277 and a 405 nm laser, 450/50 filter for EBFP. Sphero rainbow calibration particles, 8 peaks (Spherotech)  
278 were used for instrument normalization and MEFL calculation. Median fluorescent intensity of the  
279 entire transfected population (i.e., all cells positive for both experimental and transfection marker  
280 signals) or the entire chromosomally integrated cell pool was measured in histograms (for single color)  
281 or dot-plots (for two or more colors). The same gating was used in all experiments (cutoff value set at  
282 200 A.U. on the x-axis of the histogram or on both x- and y-axis of the dot-plot). Data were analyzed  
283 with FACSDiva software (BD Biosciences), FlowJo, and FCS Express 6. Flow cytometry data were  
284 largely normalized to the EF1 $\alpha$  control and presented as relative median signal intensity (%). Some  
285 fluorescent intensity data shown as A.U. (not % of the EF1 $\alpha$  control) represent the original readout of  
286 the fluorescent intensity from the flow cytometer without normalizing to the control group. Cell sorting  
287 was performed on a FACS Aria cell sorter in the Swanson Biotechnology Center Flow Cytometry  
288 Facility at the Koch Institute (Cambridge, MA, USA). Untransfected CHO-K1 and HEK293 cells and  
289 unintegrated single- and multi-LP cells were used to set the gating. Different selection and sorting  
290 schemes were applied to target payload integration into specific LP sites, including: 1) single  
291 positive/single negative (EYFP+/EBFP- or EYFP-/EBFP+), 2) double-negative (EYFP-/EBFP-), or 3)  
292 double-negative/mKate-positive (EYFP-/EBFP-/mKate+) to select multi-LP cells with the payload(s)  
293 integrated into each designated LP. For pooled cell sorting, all sorted cells were initially seeded at  
294 5,000-10,000 cells/cm<sup>2</sup> in 24-well plates with 1 mL complete culture medium containing no antibiotics.  
295 For clonal cell sorting, single cells were initially sorted into flat-bottom 96-well plates with 100  $\mu\text{L}$



296 complete culture medium containing no antibiotics for clonal expansion and subsequently selected  
297 and expanded in 24-well and 6-well plates and T75 flasks.

298

### 299 **RNA Extraction and RT-qPCR analysis**

300 Chromosomally integrated CHO cells ( $3 \times 10^6$ ) were collected for RNA extraction. Total RNA was  
301 extracted using the RNeasy Plus kit (74034, Qiagen) according to the manufacturer's instructions.  
302 cDNA synthesis was performed using an iScript cDNA synthesis kit (Bio-Rad, Hercules, CA).  
303 Quantitative real-time PCR (RT-qPCR) was carried out in a LightCycler 96 System (Roche, Basel,  
304 Switzerland) using a KAPA SYBR FAST qPCR kit (KAPA Biosystems, Wilmington, MA, USA)  
305 according to the manufacturer's instructions. The primer sequences of mKate and GAPDH for RT-  
306 qPCR are shown in **Supplemental Table 1**.

307

### 308 **Human antibody production and detection**

309 A genetic circuit expressing one copy of dCas-VPR was first integrated into dLP-CHO cell lines. Cells  
310 were selected once with hygromycin (250  $\mu\text{g}/\text{mL}$ ) and G418 (250  $\mu\text{g}/\text{mL}$ ) for 10 days, followed by  
311 FACS sorting into a pool of single-positive cells using the LP-fluorescent reporters. A second,  
312 crisprTF-driven gene circuit expressing a human mAb, either JUG444 (Pfizer) or an anti-hPD1 (5C4)  
313 [10], was then integrated into the sorted cells. Doubly integrated cells were selected once by  
314 incubating them for 10 days with puromycin (8  $\mu\text{g}/\text{mL}$ ), blasticidin (10  $\mu\text{g}/\text{mL}$ ), hygromycin (250  $\mu\text{g}/\text{mL}$ ),  
315 and G418 (250  $\mu\text{g}/\text{mL}$ ), followed by FACS sorting into a pool of double-negative (EYFP-/EBFP-) cells  
316 using the LP-fluorescent reporters. All experiments were performed with 3 independently transfected  
317 biological replicates. For mAb expression analysis,  $1.5 \times 10^5$  cells were seeded in 24-well plates with  
318 0.5 ml cHAMS-F12 medium per well without any antibiotics and maintained at 37°C for 4 days.  
319 Conditioned media were collected on day 4 for measurements. For long-term mAb expression  
320 analysis, master cultures were maintained and passaged accordingly for up to 5 weeks with  
321 measurements performed on the same day weekly. The amount of secreted JUG444 or anti-hPD1  
322 was measured in duplicate with the Octet RED96 system using Protein A biosensors (ForteBio).  
323 Purified JUG444 or anti-hPD1 was used to generate a standard curve, from which the mAb titers were  
324 derived. Doubling time of each mAb-expressing cell population was estimated by proliferation of  $5 \times 10^4$   
325 cells after 2 days of culture and subsequently compared with that of singly-occupied dLP-CHO cells  
326 without any mAb gene circuit.

327

### 328 **CHO-Tumor-T cell co-culture model and anti-tumor activity analysis**

329 dLP-CHO cells with an integrated gene circuit expressing anti-hPD1 (5C4) were seeded into a 12-  
330 well plate in triplicate at a density of  $1 \times 10^5$  cells/well with 1 mL CHO cell culture medium. Cells were  
331 incubated at 37°C for 48 hours. Pre-activated human T cells and human ovarian cancer cells  
332 (OVCAR8) expressing a surface T-cell engager [10] were mixed at an effector-to-target (E:T) ratio of  
333 20:1 ( $1 \times 10^6$ : $0.5 \times 10^5$  cells) in 1 mL T-cell culture medium (RPMI-1640 with 10% FBS, 1% P/S, 10 mM

334 HEPES, 0.1 mM non-essential amino acids, 1 mM sodium pyruvate, and 50  $\mu$ M 2-Mercaptoethanol)  
335 and then added to each well containing attached dLP-CHO cells. Co-cultures of three cell types (CHO,  
336 OVCAR8, and T cells) were incubated at 37°C. Cell-free supernatants were collected and processed  
337 at 24 hours and stored at -20°C. As an indicator of the T-cell response to tumor cells in the presence  
338 of actively secreted anti-hPD1 from dLP-CHO cells, interferon (IFN)- $\gamma$  produced by T cells was  
339 quantified. IFN- $\gamma$  concentrations in cell-free supernatants were determined by Human IFN- $\gamma$  DuoSet  
340 enzyme-linked immunosorbent assay (ELISA; DY285; R&D systems, Minneapolis, MN, USA). EYFP-  
341 /EBFP+ dLP-CHO cells with no anti-hPD1 payload circuit were used as the control cells.

342

### 343 **Statistical analysis**

344 All quantitative data are presented as mean  $\pm$  standard deviation (SD). Statistical differences between  
345 groups were analyzed by Student's *t*-test (for two groups), one-way ANOVA (for multiple groups), or  
346 two-way ANOVA (for long-term stability measurements) with 95% confidence interval. Statistical  
347 significance was set at  $p \leq 0.05$ . A Dunnett or a Tukey test was performed to correct for multiple  
348 comparisons in ANOVA post-hoc analysis. All statistical analyses, including correlation analysis and  
349 linear regression, were performed and graphed with GraphPad Prism 7.0 (GraphPad Software, La  
350 Jolla, CA, USA) statistics software.

351

## 352 **Results**

### 353 **Construction of a programmable, modular synthetic transcription system with crisprTFs**

354 To enable high tunability and versatility of the synthetic transcription system for a wide spectrum of  
355 applications, we adopted a 3-tiered modular library design [33]. The Tier 1 entry vector library encodes  
356 a variety of interchangeable gene regulatory parts and effector genes, including crisprTFs, gRNAs,  
357 operators, and other components (**Figure 1A**). Tier 1 parts can be assembled into the Tier 2  
358 expression vector library for transient expression, followed by modular assembly into the Tier 3  
359 integration gene circuit library (**Figure 1A**). We built a library of guide RNAs (gRNAs) that were  
360 orthogonal to the CHO genome and first selected eight of the scored ones for evaluation (**Figure 1B**).  
361 For each gRNA, we designed a corresponding operator containing 8x complementary gRNA BS to  
362 drive the expression of a far-red fluorescent reporter gene, mKate, and evaluated their performance  
363 episomally (**Figure 1C** and **Supplemental Figure 1**). Flow cytometry results showed a wide range of  
364 mKate expression levels among different gRNAs (**Figure 1D**). As active natural mammalian promoter  
365 sequences typically have a high GC content (57%) [38], we reasoned that the GC content of the  
366 protospacer adjacent motif (PAM)-proximal seed region (8-12 bases at the 3' end of a gRNA and its  
367 BS sequence) plays a role in regulating gene expression. gRNAs with a GC content of around 50-  
368 60% in seed sequences appeared to express mKate at higher levels than gRNAs with a lower or  
369 higher GC content (**Figure 1B** and **1D**). Therefore, we selected a relatively weak gRNA (gRNA9) with  
370 a high GC content ( $\geq 70\%$ ) and introduced mutations in 2 consecutive bases within the seed sequence  
371 to alter its GC content. The resulting gRNA10 and its matching operator, with  $\geq 50\%$  GC and still

372 orthogonal to the CHO genome, yielded much higher mKate expression than its ancestor, gRNA9  
373 (**Figure 1D**,  $p=0.0004$ ). The CMV control and gRNA1, 2, 6, 7, and 10 had higher expression (**Figure**  
374 **1D**, all  $p\leq 0.0005$ ), while only gRNA4 had lower expression, than the EF1 $\alpha$  control (**Figure 1D**,  $p<0.05$ ).  
375 The expression obtained with gRNA1, 2, and 10 was not significantly different from that obtained with  
376 the CMV control (all  $p>0.05$ ). Overall, the top four gRNAs, with more than 2-fold higher expression  
377 than EF1 $\alpha$ , had 50-60% GC in the first 8-10 bases of the seed sequences (**Supplemental Figure 2**).  
378 We selected three representative gRNAs that yielded weak (gRNA4), medium (gRNA7), and strong  
379 expression (gRNA10) to investigate further. A comparison of three crisprTFs (dCas-VP16, dCas-VP64,  
380 dCas-VPR) showed that dCas-VPR yielded a markedly higher expression level than dCas-VP16 or  
381 dCas-VP64 (**Supplemental Figure 3**, both  $p<0.0001$ ), consistent with a previous report [27]. Thus,  
382 to enable the largest dynamic expression range possible, we selected dCas-VPR for subsequent  
383 investigation.

### 384 385 **Transcriptional programming in multiple mammalian cell types**

386 To control gene expression at distinct levels, we built a library of synthetic operators containing 2x-  
387 16x gRNA BS for gRNA4, 7, and 10 (**Figure 1C**). Transient expression of mKate was assessed in  
388 CHO cells at 48 hours post-transfection (**Supplemental Figure 4**). Flow cytometry data showed  
389 dramatically different patterns of mKate expression among the three gRNA series (**Figure 2A**).  
390 Comparison of each gRNA series with expression levels observed with the EF1 $\alpha$  promoter control  
391 showed: reporter activities for the gRNA4 series that ranged from 15% (2x BS) to 270% (16x BS),  
392 with 2x-8x BS driving notably lower, and 16x BS driving significantly higher, expression; reporter  
393 activities for the gRNA7 series that ranged from 26% (2x BS) to 760% (16x BS), with 2x-4x BS driving  
394 notably lower, and 8x-16x BS driving significantly higher, expression; and reporter activities for the  
395 gRNA10 series that ranged from 30% (2x BS) to 1107% (16x BS), with 6x-16x BS having significantly  
396 higher expression (**Figure 2A**). Significant correlations between expression levels and the number of  
397 BS were found with all three gRNA series (**Supplemental Figure 5A**, all  $p<0.05$ ). Overall, with  
398 differences in gRNA sequences and the number of complementary gRNA BS in the operators, we  
399 achieved a wide dynamic range of approximately 74-fold change in the intensity of the reporter signals  
400 with these gRNA series in CHO cells. Gene expression was proportionate to the number of BS,  
401 indicating consistent tunability.

402  
403 To translate these results into other mammalian cell types (mouse, rat, and human), we selected the  
404 gRNA10 series because it had the lowest leakage and the highest expression among the three  
405 comprehensively tested gRNAs. Interestingly, we observed dramatic differences in mKate expression  
406 with the CMV control in mouse C2C12 myoblasts (**Figure 2B**), HEK293T cells (**Figure 2C**), rat H9c2  
407 cardiac myoblasts (**Figure 2D**), and hiPSCs (**Figure 2E**). The gRNA10 series behaved in a similar  
408 order in these cells as it did in CHO cells. In C2C12 myoblasts, mKate expression ranged from 11%  
409 (2x BS) to 316% (16x BS) of EF1 $\alpha$ , with 2x-6x BS being notably lower and 8x-16x BS being

410 significantly higher than that observed with EF1 $\alpha$  (**Figure 2B**). In HEK cells, mKate expression ranged  
411 from 60% (2x BS) to 1026% (16x BS) of EF1 $\alpha$ , with 6x-16x BS being significantly stronger than EF1 $\alpha$   
412 (**Figure 2C**). In rat H9c2 cells, mKate expression ranged from 27% (2x BS) to 688% (16x BS) of EF1 $\alpha$ ,  
413 with 6x-16x BS being significantly stronger than EF1 $\alpha$  (**Figure 2D**). In hiPSC cells, mKate expression  
414 ranged from 80% (2x BS) to 950% (16x BS) of EF1 $\alpha$ , with 8x-16x BS being significantly stronger than  
415 EF1 $\alpha$  (**Figure 2E**). Similarly, expression levels and the number of BS markedly correlated in all four  
416 rodent and human cell types tested with the gRNA10 series (**Supplemental Figure 5B-E**, all  $p \leq 0.001$ ).  
417 Collectively, with the gRNA10 series alone, we achieved up to approximately 29-fold and 17-fold  
418 changes in mKate expression in rodent and human cells, respectively.

419  
420 To compare the programmable functionality of our crisprTF-based transcription platform to another  
421 orthogonal synthetic TF-based system, we constructed a Gal4-VPR-based platform containing 2x-8x  
422 UAS-BS with the same architecture (**Supplemental Figure 6A**). Although the Gal4-VPR/UAS system  
423 achieved mKate expression ranging from 11% (2x UAS-BS) to 745% (4x UAS-BS) of crisprTF 8x  
424 gRNA10-BS in CHO-K1 cells (**Supplemental Figure 6B**), we observed no correlation between gene  
425 expression levels and the number of UAS BS in the operators (**Supplemental Figure 6C**,  $p > 0.05$ ).  
426 Altogether, these results underscore the predictability and tunability of our crisprTF-based system in  
427 mammalian cells.

428

### 429 **Incorporation of additional genetic control elements to enhance gene expression**

430 To extend tunability over a greater range, we incorporated the following additional genetic control  
431 elements in the crisprTF-based system: (i) a strong synthetic transcriptional activator-SAM; (ii) dual  
432 gRNA TUs to increase gRNA expression; (iii) an additional 2x nuclear localizing sequence (NLS) at  
433 the 5' end of dCas-VPR; and (iv) a synthetic intron (SI) to enhance gene expression [39] (**Figure 3**).  
434 Transient mKate expression in CHO-K1 cells was assessed at 48 hours post-transfection. The  
435 combination of SAM, dCas-VPR, and the gRNA10 8x BS operator resulted in a 48% increase in gene  
436 expression ( $p = 0.0003$ ); however, gene expression decreased by 12.3% when SAM was combined  
437 with dCas-VPR and the 16x BS operator ( $p = 0.0023$ ), suggesting a limitation of gene activation by  
438 conjoining various TADs (**Figure 3A**). With the addition of an extra gRNA10 TU to boost the amount  
439 of gRNA, we observed modest increases, of 18.7% ( $p = 0.0278$ ) and 17.5% ( $p = 0.009$ ), with gRNA10  
440 8x and 16x BS operators, respectively (**Figure 3B**). Thus, a single gRNA TU may be sufficient for  
441 many applications. With an additional 2x NLS incorporated at the 5' end of dCas-VPR, mKate  
442 expression increased by 64.0% ( $p = 0.0055$ ) and 33.0% ( $p = 0.0034$ ) with gRNA10 8x and 16x BS  
443 operators, respectively, suggesting that the nuclear localization of the original dCas-VPR may be  
444 slightly insufficient to gain maximum activation of gene expression (**Figure 3C**).

445

446 On the other hand, the addition of SI at the 5' untranslated region (UTR) of the target gene led to an  
447 approximately 200-300% elevation in mKate signals with nearly all operators in all three gRNA series

448 when compared with their original counterparts, even with the strongest operator (i.e., 16x BS of  
449 gRNA10; **Supplemental Figure 7**). The gRNA4-SI series yielded expression levels that ranged from  
450 70% (4x BS+SI) to 528% (16x BS+SI) of those observed with the EF1 $\alpha$  promoter, with 8x-16x BS+SI  
451 being notably higher than the EF1 $\alpha$  control; the gRNA7-SI series ranged from 65% (4x BS+SI) to  
452 532% (16x BS+SI) of EF1 $\alpha$ , with 8x-16x BS+SI being significantly higher than the EF1 $\alpha$  control; the  
453 gRNA10-SI series ranged from 205% (4x BS+SI) to 2463% (16x BS+SI) of EF1 $\alpha$ , with 8x-16x BS+SI  
454 showing significantly higher expression than that observed with the EF1 $\alpha$  promoter (**Figure 3D**). We  
455 did not observe any substantial increases of fluorescent signals in the absence of gRNA in any of the  
456 SI constructs (**Figure 3D**). These results indicated that SI can be fully compatible with synthetic  
457 crisprTF promoter-based gene regulation and is an efficient control element to increase gene  
458 expression. Notable correlations were found between expression levels and the number of BS with  
459 the gRNA4-SI and gRNA10-SI series (**Supplemental Figure 8**, both  $p < 0.05$ ). Taken together, by  
460 adding SI to the original gRNA operators, we expanded the achievable dynamic expression range in  
461 CHO cells to an approximately 167-fold change, offering analogue precision control of gene  
462 expression with a near-continuous spectrum (**Supplemental Figure 9**).

#### 463 464 **Precision control of gene expression via genomic integration**

465 We designed our crisprTF promoter platform to be fully compatible with our multi-LP DNA integration  
466 platform [30] for the stable expression of large gene circuits in engineered mammalian cells. We built  
467 gene circuits that contained insulated TUs encoding different gRNAs, gRNA operator-target gene  
468 pairs, and a crisprTF, together with an integration-enabled circuit selection marker, puromycin (**Figure**  
469 **4A** and **Supplemental Figure 10**). Chromosomal integration of a single DNA copy of the gene circuit  
470 was mediated by BxB1 integrase into a single LP (sLP) locus in engineered adherent CHO (**Figure**  
471 **4A**). After selection with puromycin for integration in engineered sLP-CHO cells, indicated by the  
472 disappearance of the EYFP signal, we analyzed target gene expression by flow cytometry. Both the  
473 gRNA4 and gRNA10 series exhibited tunable control of expression profiles in sLP-CHO cells, similar  
474 to that seen with their episomal counterparts (**Figure 4B**). Gene expression of the gRNA4 series  
475 ranged from 7% (2x BS) to 56% (16x BS) of that observed with the integrated EF1 $\alpha$  control, with 2x-  
476 6x BS exhibiting markedly lower expression than with EF1 $\alpha$ ; the gRNA10 series ranged from 13% (2x  
477 BS) to 207% (16x BS) of EF1 $\alpha$ , with 2x-4x BS also exhibiting significantly lower expression than with  
478 EF1 $\alpha$ . Adding SI at the 5' UTR resulted in 200-250% increases in target gene expression with  
479 representative integration circuits (**Figure 4B**, right side of the panel). With a single genomically  
480 integrated copy, only gRNA10 16x BS without SI (207%) and 8x and 16x BS with SI (223% and 521%  
481 respectively) exhibited significantly stronger expression than seen with the integrated EF1 $\alpha$  control  
482 (**Figure 4B**). Similar to what was observed with their episomal counterparts, when both the gRNA4  
483 and gRNA10 series were chromosomally integrated into sLP, the correlations between the number of  
484 BS in the synthetic operator and gene expression levels were highly significant (**Supplemental**  
485 **Figure 10A**; both  $p < 0.005$ ).

486 To provide evidence that our crisprTF-based transcription system directly programs gene transcription,  
487 we measured the transcription levels of mKate in chromosomally integrated CHO cells. In line with  
488 mKate expression determined by flow cytometry, gene transcription of the gRNA10 series ranged  
489 from 5.7% (2x BS) to 833% (16x BS with SI) of EF1 $\alpha$  (**Supplemental Figure 10B**). Intriguingly, with  
490 the addition of the SI, the transcription of mKate increased 6.9 folds (8x BS) and 4.3 folds (16x BS),  
491 indicating that the SI may be able to upregulate gene transcription. The correlation between the  
492 number of BS and gene transcription levels was markedly significant (**Supplemental Figure 10C**,  
493  $p=0.0002$ ).

494 To demonstrate that crisprTF circuit integration functions in human cells, we engineered a sLP in  
495 HEK293 cells and performed BxB1-mediated chromosomal integration with the gRNA10 series  
496 (**Supplemental Figure 11A**). In sLP-HEK293 cells, gene expression of the gRNA10 series ranged  
497 from 17% (2x BS) to 401% (16x BS) of EF1 $\alpha$  (**Supplemental Figure 11B**), similar to what we recorded  
498 in sLP-CHO cells. The number of BS correlated strongly with gene expression levels in sLP-HEK293  
499 cells integrated with the gRNA10 series (**Supplemental Figure 11C**,  $p=0.0007$ ).

500 Nonetheless, by observing the expression profiles of puromycin-selected pools of crisprTF circuit  
501 integrants in sLP-CHO cells, we found that after 4 weeks of culturing, all four circuits from both the  
502 gRNA4 and gRNA10 series had notably decreased expression levels, suggesting the instability of  
503 gene expression (**Supplemental Figure 10D**, all  $p<0.05$  at 4 weeks post selection). To sustain long-  
504 term expression profiles, we incorporated an additional 3' flanking selection marker, blasticidin, into  
505 dCas-VPR, linked by a 2A self-cleavage peptide (**Figure 4C**) [40]. Flow cytometry results  
506 demonstrated gene expression levels that were similar or even slightly higher with most integration  
507 circuits immediately after one-time dual selection, compared with their unmodified counterparts  
508 (**Figure 4D**). Unlike what was observed with the CMV control (**Figure 4E**,  $p<0.0001$  at 2 and 4 weeks),  
509 observations over four weeks revealed improved stability in expression levels, with no marked change  
510 for any of the four circuits examined (**Figure 4E**, all  $p>0.05$  at 2 and 4 weeks). Collectively, these data  
511 suggest that a flanking selection marker co-expressed with the dCas-VPR gene may stabilize the  
512 crisprTF circuit post-integration in sLP-CHO cells.

513

### 514 **Modulation of human monoclonal antibody production**

515 The controllable production of mAbs is desirable for many biomedical applications. To determine  
516 whether our transcriptional platform could be used for the precise control of antibody synthesis, we  
517 built integration gene circuits expressing a human mAb, JUG444, with the immunoglobulin kappa light  
518 chain (LC) and immunoglobulin gamma heavy chain (HC) genes separately expressed by the same  
519 gRNA10 operator as independent TUs (**Figure 5A**). We had previously observed that dCas9-VPR  
520 expression could occasionally be unstable when this construct was expressed at high levels under  
521 the control of CMVp (data not shown). To avoid the instability of dCas9-VPR expression during long-  
522 term culture, we used adherent double LP (dLP)-CHO cells, engineered with two distinct wild-type  
523 LPs: dLP1-1 and dLP1-2, to accommodate an additional copy of the dCas9-VPR gene (**Figure 5A**)

524 [31, 41]. We first performed a targeted integration into dLP1-1 alone in dLP-CHO cells with a DNA  
525 payload encoding dCas9-VPR (**Figure 5A**). Cells were selected with three antibiotics and then  
526 subjected to single-cell FACS to isolate EYFP-/EBFP+ clones with the stably integrated dLP1-1 site  
527 and the free dLP1-2 site.

528

529 The functionality of clonally expanded cells was examined by integrating individual gRNA10 control  
530 circuits that co-expressed mKate and a monomeric blue fluorescent reporter, TagBFP, as well as  
531 another copy of the dCas9-VPR gene, as independent TUs into the dLP1-2 site (**Figure 5A**). Dually  
532 integrated cells were selected with four antibiotics and then FACS-sorted into pools to expand them  
533 and evaluate reporter expression (**Figure 5A**). We found that mKate and TagBFP driven by the same  
534 gRNA10 operators were simultaneously expressed at similar levels in two distinct configurations (8x  
535 BS without SI and 16x BS with SI), suggesting uniform transcriptional activation of both reporter TUs  
536 by two separate copies of the dCas-VPR gene (**Figure 5B and Supplemental Figure 12A**). Next,  
537 we replaced the control circuit in the dLP1-2 site with individual gRNA10 mAb circuits that differentially  
538 express JUG444 (**Figure 5A**). Similarly, cells with mAb circuits were selected and FACS-sorted into  
539 pools.

540

541 To examine the precision regulation and long-term stability of mAb production, we maintained cultures  
542 of sorted cell pools over five weeks and measured mAb concentration weekly, without constant  
543 antibiotic selection. We recorded differential JUG444 production in Week 1, driven by four distinct  
544 configurations: 8x or 16x BS, with or without SI (JUGAb1-4, **Figure 5C**). Stable mAb production from  
545 a single mAb gene copy was sustained throughout the experimental duration with all four  
546 configurations (**Figure 5C**). Strikingly, mAb production levels significantly correlated with the gRNA10  
547 operator strengths documented in Figure 4D (**Figure 5D**,  $p < 0.05$  at all time points). The strongest  
548 operator (16x BS with SI) yielded the highest mAb level, which was comparable to the level previously  
549 observed with the strong constitutive CMVp expressing two mAb gene copies [30]. The doubling time  
550 of JUGAb3 (16x BS) and JUGAb4 (16x BS with SI) increased to 22 and 34 hours, respectively,  
551 suggesting the influence of increased antibody production on cell growth in engineered dLP-CHO  
552 cells (**Figure 5E**). Overall, these data indicated that tunable and lasting control can be applied to  
553 express human antibodies and potentially other therapeutic proteins.

554

### 555 **Programmable control of the human T-cell immune response against tumor cells**

556 To explore the applications of our platform for cellular therapy, we built gRNA10 integration circuits  
557 with various configurations to program the secretion of anti-hPD1, an important immune checkpoint  
558 inhibitor widely used as a therapy in immuno-oncology [29]. The light chain and heavy chain of anti-  
559 hPD1 were separately expressed by the same gRNA10 operators as independent TUs (**Figure 6A**).  
560 Similar to the JUG444 production, a copy of dCas9-VPR was pre-integrated into the dLP1-1 site of  
561 the dLP-CHO cells to avoid its complete silencing. Each of the four circuits, designed to differentially

562 express anti-hPD1 (8x or 16x BS, with or without SI), was then integrated into the dLP1-2 site of the  
563 dLP-CHO cells, which had been selected and clonally sorted for dLP1-1 occupancy (PD1Ab1-4,  
564 **Figure 6B**). Dually integrated cells were selected and then sorted into pools with FACS for expansion.  
565 Quantification of anti-hPD1 secretion by sorted cells showed that the PD1Ab4 group (16x BS with SI)  
566 had a significantly higher titer of anti-hPD1 than all the other groups (**Figure 6B**, all  $p < 0.001$ ) and that  
567 the PD1Ab3 group (16x BS without SI) had a notably higher titer than the PD1Ab1 group (8x BS  
568 without SI) (**Figure 6B**,  $p < 0.05$ ). A strong correlation was found between anti-hPD1 titers and crisprTF  
569 promoter strengths (**Figure 6C**,  $p < 0.005$ ).

570

571 To demonstrate the functionality of actively secreted anti-hPD1, we developed a three-way CHO-  
572 tumor-human T cell co-culture system (**Figure 6D**). We hypothesized that differentially programmed  
573 anti-hPD1 secretion would enhance T cell effector function by correspondingly blocking the  
574 interactions between tumor cells and T cells, mediated by the engagement of PD1 with programmed  
575 death ligands. Sorted, dually integrated dLP-CHO cells with individual configurations expressing anti-  
576 hPD1 were first seeded. Pre-activated human T cells and ovarian cancer cells expressing a surface-  
577 displayed T-cell engager were then added to the attached dLP-CHO cells [10]. IFN- $\gamma$  production by T  
578 cells was measured at 24 hours post-co-culture as a marker of T cell activation (**Figure 6D**). T cells  
579 in the PD1Ab3 and PD1Ab4 groups produced significantly more IFN- $\gamma$  than the control group ( $p < 0.05$   
580 and  $p < 0.01$  respectively), corresponding to the higher titers of anti-hPD1 secretion (**Figure 6E**). IFN-  
581  $\gamma$  production also notably correlated with anti-hPD1 titers in dLP-CHO cell cultures prior to the start of  
582 co-culturing (**Supplemental Figure 12B**,  $p < 0.05$ ). Thus, this transcription system can be used to  
583 produce functional proteins of clinical interest and perturb cellular phenotypes in a highly regulated  
584 and precise manner.

585

## 586 **Discussion**

587 We have built and characterized a crisprTF promoter system for the programmable regulation of gene  
588 expression in mammalian cells. This system functions consistently across multiple mammalian cell  
589 types and is, therefore, sufficiently versatile to be used in a variety of cellular models for biomedicine  
590 and biomanufacturing.

591

592 To demonstrate the generalizability of the system's gene regulatory activity, we used both episomal  
593 vectors in transiently transfected cells and site-specific, stably integrated chromosomal constructs in  
594 LP-engineered cells. We modulated three key parameters: 1) the gRNA sequence; 2) the number of  
595 gRNA BS repeats in the operator; and 3) the CRISPR-based transcriptional activator (different  
596 crisprTFs, different selection markers in the crisprTF, or an additional copy of the crisprTF in LP-  
597 engineered cells). We also incorporated genetic elements to enhance gene expression, including  
598 SAM, an extra gRNA TU, extra NLS, and SI in the operator. Systematic characterization of these  
599 constructs resulted in  $>1,000$ -fold range of gene expression levels. The strongest of our synthetic



600 promoters, composed of 16x gRNA BS repeats, was significantly stronger than CMVp, one of the  
601 strongest constitutive promoters currently used for mammalian applications [13]. Recent systematic  
602 investigation of mismatched single gRNAs (sgRNAs) has revealed sgRNA-DNA interaction rules  
603 controlling endogenous gene expression and correlated phenotype [42]. In agreement with previous  
604 findings, our introduction of a 2-bp mutation that moderately altered the GC ratio in the PAM-proximal  
605 seed region of gRNA10 and its BS markedly changed its gene expression profiles, suggesting the  
606 importance of the gRNA seed sequence in controlling our crisprTF promoter-driven transcriptional  
607 activities. We anticipate that additional large-scale experimental screening, combined with  
608 computational modeling or machine learning, could be used to program gene expression even more  
609 precisely.

610  
611 Various mechanisms of controlling gene expression at the transcriptional level in eukaryotes have  
612 been identified [43, 44]. Core promoters and neighboring genetic elements play instrumental roles in  
613 consolidating complex cascades of signaling events involved in transcription, impacting gene  
614 expression [43]. The complexity of combinatorial interactions among constituent TF regulatory  
615 elements hinders the creation of synthetic mammalian promoters using natural motifs. Although this  
616 issue has been gradually resolved *in silico*, it remains challenging to overcome the context- or  
617 species-dependency for the *de novo* design of mammalian promoters [44]. Positive transcriptional  
618 elements have been found between -350 and -40 bp relative to the transcription start sites (TSS) in  
619 many of the tested human promoters, whereas negative regulatory elements are more likely to be  
620 located -350 to -1000 bp upstream of the TSS [38]. Therefore, we positioned our synthetic operators  
621 at up to roughly -400 bp upstream of the TSS. Our data are consistent with previous reports  
622 suggesting that longer transcriptional bursts and thus higher expression levels might be achieved with  
623 synthetic transcriptional activators by arraying multiple BS upstream of a given promoter [28, 45]. The  
624 results of our episomal tests with all three gRNA series established strong linear correlations between  
625 gene expression levels and the number of BS (up to 16x) in the operators in multiple mammalian  
626 species and cell types (**Supplemental Figures 5 and 8**). We found similar significant correlations with  
627 two gRNA series when they were genomically integrated in LP-engineered cells (**Supplemental**  
628 **Figure 10A and 11C**).

629  
630 Besides tuning transcriptional activities by altering gRNA sequences and operator strengths, we  
631 discovered several compatible genetic control elements that synergistically augment gene expression.  
632 When combined with dCas-VPR, SAM moderately increased expression at medium, but not high,  
633 levels episomally. We examined the compatibility of SAM with dCas-VPR when genomically  
634 integrated, by assembling large gRNA circuits that contained independent TUs encoding both systems  
635 (**Supplemental Figure 13A**). Surprisingly, the VPR-SAM hybrid system at medium expression level  
636 generated no further increase in gene expression; in fact, at high expression level, VPR-SAM actually  
637 decreased expression (**Supplemental Figure 13B**). This seemingly paradoxical result suggested

638 possible competition for transcriptional resources among components within the hybrid system, for  
639 example, overlapping TADs encoded in SAM and dCas-VPR genes, including VP64 and p65 [46, 47].  
640 It remains to be tested whether alternative CRISPR-based gene activation strategies, such as the  
641 CRISPR-assisted *trans* enhancer, would be compatible for combinatorial use with our system for  
642 auxiliary augmentation of transcription [48].

643

644 On the other hand, introns, which enhance gene expression in mammalian cells when applied as a  
645 positive regulatory element [49], have been proposed to control post-transcriptional RNA processing  
646 or transport [39]. Here, the incorporation of an SI immediately downstream of the operator in the 5'  
647 UTR of the target gene [50] increased gene expression at least 200% with nearly all tested constructs,  
648 whether episomal or chromosomal, suggesting a high degree of compatibility between the  
649 transcriptional control by the crisprTF promoters and the intron-mediated enhancement by SI [51].  
650 RT-qPCR data also suggest that an SI in the 5' UTR directly contributes to gene transcription in our  
651 crisprTF promoter system, consistent with gene expression enhancement by 5' UTR sequences [52].  
652 However, overly strong target gene expression may impact cell proliferation (**Figure 5E**). Thus, it is  
653 essential to balance target gene expression with cellular homeostasis when employing strong  
654 crisprTF promoters. Moreover, the large size of the crisprTF promoter constructs, especially with  
655 additional genetic regulatory elements, limits their use with LP-engineered cells for long-term  
656 expression. Broader applications in biomedicine may require minimizing construct size.

657

658 CHO cells, approved by regulatory agencies, are widely used by the pharmaceutical industry for the  
659 biomanufacturing of recombinant therapeutic proteins with human-like glycosylation profiles [53, 54].  
660 CMVp and Simian virus 40 early promoter are frequently used in CHO cells to produce high titers of  
661 therapeutic proteins [55]. Yet, protein-producing cell lines often exhibit a wide range of gene  
662 expression profiles, even at the clonal level, and the mechanisms that drive viral promoters in  
663 eukaryotic cells are ill-defined [56, 57]. Natural promoters have often evolved synchronously with  
664 functionalities that depend on specific genetic contexts, so promoter activity may not transfer across  
665 various genes, conditions, or species [43, 57]. The growing number of biotherapeutic proteins in  
666 development has created an increasing demand for efficient long-term protein expression systems  
667 for biomanufacturing, ideally with built-in programmable control for improved consistency and  
668 predictable yields.

669

670 Coupled with the LP technology, we demonstrated the long-term stability of precisely tuned human  
671 mAb production with the crisprTF promoter system. Antibody yields obtained with the strongest  
672 crisprTF circuit expressing a single mAb LC/HC cassette were similar to those obtained with two or  
673 six mAb cassettes driven by CMV or EF1 $\alpha$  promoters, respectively, in LP-engineered CHO cells [30].  
674 The high production efficiency of our strong crisprTF circuits, along with their built-in modularity and  
675 scalability, suggests that they can be adapted to achieve industrially relevant mAb titers. Our platform

676 may also be applied, more generally, to CHO strains optimized for industrial bioreactor conditions to:  
677 1) increase target protein production in a predictable and controlled manner; 2) produce multiple target  
678 proteins simultaneously with specific ratios; and 3) strike a balance between cell behaviors and protein  
679 production in long-term cultures.

680

681 To exogenously modulate target gene expression by controlling gRNA transcription levels, we  
682 incorporated two types of small molecule-inducible switches into the RNA polymerase III (Pol III)  
683 promoter (**Supplemental Figure 14A**). The results in the episomal context indicate that gRNA  
684 transcription could be tuned by adjusting the concentrations of the inducers Dox and IPTG for Tet and  
685 Lac operons, respectively (**Supplemental Figure 14B and C**), following gene expression kinetics at  
686 different time points (**Supplemental Figure 14D**). Thus, an additional layer of target gene tunability  
687 could be achieved in our crisprTF promoter system by using inducible Pol III promoters.

688

689 In conclusion, we have built a tunable, scalable, and sustainable gene expression system of crisprTF-  
690 based regulatory elements. This platform should enable programmable, multiplexed gene modulation  
691 for broad applications, such as mammalian synthetic biology, biomanufacturing, and precision  
692 medicine.

693

#### 694 **Acknowledgements**

695 The authors gratefully thank Nevin M. Summers and Dr. Louane Hann for their administrative support,  
696 Kristjan E. Kaseniit for his contribution in gRNA design, Dr. Kevin J. Lebo for his expert input in the  
697 system design, Dr. Samuel D. Perli for genetic materials, Dr. Lei Wang for providing the hiPSC cell  
698 line, and Dr. Wen Allen Tseng for genetic materials and his contribution to construct design. We greatly  
699 thank Selamawit Mamo, Kalpana Jagtap, Na Li, Cong Liu, and Jonathan L. Lyles for their technical  
700 support with CHO cell cultures and assays, Mailing Ding and Christina Harrison for their technical  
701 support with molecular cloning and plasmid preparation, and Karen Pepper for editing the manuscript.  
702 We thank Dr. G. Felsenfeld (National Institute of Diabetes and Digestive and Kidney Diseases, USA)  
703 for the HS4 insulator sequences.

704

#### 705 **Funding**

706 This work was supported by the Pfizer-MIT RCA Synthetic Biology Program (CHO2.0 and Precision  
707 Post-Translational Modification to T.K.L. and R.W.). This project was also supported in part by the  
708 National Science Foundation (CCF-1521925 to T.K.L.), the National Institutes of Health (NIH) (5-U01-  
709 CA2550554-02, 50000655-5500001351, and 5R01HL135886 to T.K.L.), and the University of South  
710 Dakota Sanford School of Medicine (Startup Fund to W.C.). W.C. was supported in part by the NIH  
711 Ruth L. Kirschstein NRSA postdoctoral fellowship (5T32HL007208) and the Department of Defense  
712 (W81XWH2110089 to W.C).

713

714 **Data availability**

715 The authors declare that all relevant data supporting the findings of this study are available within the  
716 paper and its supplementary Information. Biological materials generated in this study are available on  
717 Addgene or from the corresponding author upon request.

718

719 **Competing interests**

720 T.K.L. is a co-founder of Senti Biosciences, Synlogic, Engine Biosciences, Tango Therapeutics,  
721 Corvium, BiomX, Eligo Biosciences, OpenProtein.AI, Bota.Bio. T.K.L. also holds financial interests in  
722 nest.bio, Amplphi, IndieBio, Cognito Health, Quark Biosciences, Personal Genomics, Thryve, Lexent  
723 Bio, MitoLab, Vulcan, Serotiny, and Provectus Algae. All other authors declare no competing interests.

724

725 **References**

726 [1] G.T. Consortium, F. Aguet, A.A. Brown, S.E. Castel, J.R. Davis, Y. He, B. Jo, P. Mohammadi, Y. Park,  
727 P. Parsana, A.V. Segrè, B.J. Strober, Z. Zappala, B.B. Cummings, E.T. Gelfand, K. Hadley, K.H. Huang,  
728 M. Lek, X. Li, J.L. Nedzel, D.Y. Nguyen, M.S. Noble, T.J. Sullivan, T. Tukiainen, D.G. MacArthur, G. Getz,  
729 A. Addington, P. Guan, S. Koester, A.R. Little, N.C. Lockhart, H.M. Moore, A. Rao, J.P. Struewing, S.  
730 Volpi, L.E. Brigham, R. Hasz, M. Hunter, C. Johns, M. Johnson, G. Kopen, W.F. Leinweber, J.T.  
731 Lonsdale, A. McDonald, B. Mestichelli, K. Myer, B. Roe, M. Salvatore, S. Shad, J.A. Thomas, G.  
732 Walters, M. Washington, J. Wheeler, J. Bridge, B.A. Foster, B.M. Gillard, E. Karasik, R. Kumar, M.  
733 Miklos, M.T. Moser, S.D. Jewell, R.G. Montroy, D.C. Rohrer, D. Valley, D.C. Mash, D.A. Davis, L. Sobin,  
734 M.E. Barcus, P.A. Branton, N.S. Abell, B. Balliu, O. Delaneau, L. Frésard, E.R. Gamazon, D. Garrido-  
735 Martín, A.D.H. Gewirtz, G. Gliner, M.J. Gloudemans, B. Han, A.Z. He, F. Hormozdiari, X. Li, B. Liu, E.Y.  
736 Kang, I.C. McDowell, H. Ongen, J.J. Palowitch, C.B. Peterson, G. Quon, S. Ripke, A. Saha, A.A.  
737 Shabalín, T.C. Shimko, J.H. Sul, N.A. Teran, E.K. Tsang, H. Zhang, Y.-H. Zhou, C.D. Bustamante, N.J.  
738 Cox, R. Guigó, M. Kellis, M.I. McCarthy, D.F. Conrad, E. Eskin, G. Li, A.B. Nobel, C. Sabatti, B.E.  
739 Stranger, X. Wen, F.A. Wright, K.G. Ardlie, E.T. Dermitzakis, T. Lappalainen, F. Aguet, K.G. Ardlie, B.B.  
740 Cummings, E.T. Gelfand, G. Getz, K. Hadley, R.E. Handsaker, K.H. Huang, S. Kashin, K.J. Karczewski,  
741 M. Lek, X. Li, D.G. MacArthur, J.L. Nedzel, D.T. Nguyen, M.S. Noble, A.V. Segrè, C.A. Trowbridge, T.  
742 Tukiainen, N.S. Abell, B. Balliu, R. Barshir, O. Basha, A. Battle, G.K. Bogu, A. Brown, C.D. Brown, S.E.  
743 Castel, L.S. Chen, C. Chiang, D.F. Conrad, N.J. Cox, F.N. Damani, J.R. Davis, O. Delaneau, E.T.  
744 Dermitzakis, B.E. Engelhardt, E. Eskin, P.G. Ferreira, L. Frésard, E.R. Gamazon, D. Garrido-Martín,  
745 A.D.H. Gewirtz, G. Gliner, M.J. Gloudemans, R. Guigo, I.M. Hall, B. Han, Y. He, F. Hormozdiari, C.  
746 Howald, H. Kyung Im, B. Jo, E. Yong Kang, Y. Kim, S. Kim-Hellmuth, T. Lappalainen, G. Li, X. Li, B. Liu,  
747 S. Mangul, M.I. McCarthy, I.C. McDowell, P. Mohammadi, J. Monlong, S.B. Montgomery, M. Muñoz-  
748 Aguirre, A.W. Ndungu, D.L. Nicolae, A.B. Nobel, M. Oliva, H. Ongen, J.J. Palowitch, N. Panousis, P.  
749 Papasaikas, Y. Park, P. Parsana, A.J. Payne, C.B. Peterson, J. Quan, F. Reverter, C. Sabatti, A. Saha, M.  
750 Sammeth, A.J. Scott, A.A. Shabalín, R. Sodaiei, M. Stephens, B.E. Stranger, B.J. Strober, J.H. Sul, E.K.  
751 Tsang, S. Urbut, M. van de Bunt, G. Wang, X. Wen, F.A. Wright, H.S. Xi, E. Yeger-Lotem, Z. Zappala,

752 J.B. Zaugg, Y.-H. Zhou, J.M. Akey, D. Bates, J. Chan, L.S. Chen, M. Claussnitzer, K. Demanelis, M.  
753 Diegel, J.A. Doherty, A.P. Feinberg, M.S. Fernando, J. Halow, K.D. Hansen, E. Haugen, P.F. Hickey, L.  
754 Hou, F. Jasmine, R. Jian, L. Jiang, A. Johnson, R. Kaul, M. Kellis, M.G. Kibriya, K. Lee, J. Billy Li, Q. Li, X.  
755 Li, J. Lin, S. Lin, S. Linder, C. Linke, Y. Liu, M.T. Maurano, B. Molinie, S.B. Montgomery, J. Nelson, F.J.  
756 Neri, M. Oliva, Y. Park, B.L. Pierce, N.J. Rinaldi, L.F. Rizzardi, R. Sandstrom, A. Skol, K.S. Smith, M.P.  
757 Snyder, J. Stamatoyannopoulos, B.E. Stranger, H. Tang, E.K. Tsang, L. Wang, M. Wang, N. Van  
758 Wittenberghe, F. Wu, R. Zhang, C.R. Nierras, P.A. Branton, L.J. Carithers, P. Guan, H.M. Moore, A.  
759 Rao, J.B. Vaught, S.E. Gould, N.C. Lockart, C. Martin, J.P. Struewing, S. Volpi, A.M. Addington, S.E.  
760 Koester, A.R. Little, L.E. Brigham, R. Hasz, M. Hunter, C. Johns, M. Johnson, G. Kopen, W.F.  
761 Leinweber, J.T. Lonsdale, A. McDonald, B. Mestichelli, K. Myer, B. Roe, M. Salvatore, S. Shad, J.A.  
762 Thomas, G. Walters, M. Washington, J. Wheeler, J. Bridge, B.A. Foster, B.M. Gillard, E. Karasik, R.  
763 Kumar, M. Miklos, M.T. Moser, S.D. Jewell, R.G. Montroy, D.C. Rohrer, D.R. Valley, D.A. Davis, D.C.  
764 Mash, A.H. Undale, A.M. Smith, D.E. Tabor, N.V. Roche, J.A. McLean, N. Vatanian, K.L. Robinson, L.  
765 Sobin, M.E. Barcus, K.M. Valentino, L. Qi, S. Hunter, P. Hariharan, S. Singh, K.S. Um, T. Matose, M.M.  
766 Tomaszewski, L.K. Barker, M. Mosavel, L.A. Siminoff, H.M. Traino, P. Flicek, T. Juettemann, M. Ruffier,  
767 D. Sheppard, K. Taylor, S.J. Trevanion, D.R. Zerbino, B. Craft, M. Goldman, M. Haeussler, W.J. Kent,  
768 C.M. Lee, B. Paten, K.R. Rosenbloom, J. Vivian, J. Zhu, Genetic effects on gene expression across  
769 human tissues, *Nature* 550 (2017) 204.  
770 [2] A.A. Shukla, J. Thömmes, Recent advances in large-scale production of monoclonal antibodies  
771 and related proteins, *Trends in Biotechnology* 28(5) (2010) 253-261.  
772 [3] N. Matharu, N. Ahituv, Modulating gene regulation to treat genetic disorders, *Nature Reviews*  
773 *Drug Discovery* 19(11) (2020) 757-775.  
774 [4] M.M. Chang, L. Gaidukov, G. Jung, W.A. Tseng, J.J. Scarcelli, R. Cornell, J.K. Marshall, J.L. Lyles, P.  
775 Sakorafas, A.-H.A. Chu, K. Cote, B. Tzvetkova, S. Dolatshahi, M. Sumit, B.C. Mulukutla, D.A.  
776 Lauffenburger, B. Figueroa, N.M. Summers, T.K. Lu, R. Weiss, Small-molecule control of antibody N-  
777 glycosylation in engineered mammalian cells, *Nature Chemical Biology* (2019).  
778 [5] A. Courbet, E. Renard, F. Molina, Bringing next-generation diagnostics to the clinic through  
779 synthetic biology, *EMBO Mol Med* 8(9) (2016) 987-991.  
780 [6] Y. Higashikuni, W.C.W. Chen, T.K. Lu, Advancing therapeutic applications of synthetic gene  
781 circuits, *Current Opinion in Biotechnology* 47(Supplement C) (2017) 133-141.  
782 [7] G. Lillacci, Y. Benenson, M. Khammash, Synthetic control systems for high performance gene  
783 expression in mammalian cells, *Nucleic Acids Research* 46(18) (2018) 9855-9863.  
784 [8] S. Matsuura, H. Ono, S. Kawasaki, Y. Kuang, Y. Fujita, H. Saito, Synthetic RNA-based logic  
785 computation in mammalian cells, *Nature Communications* 9(1) (2018) 4847-4847.  
786 [9] M. Mansouri, T. Strittmatter, M. Fussenegger, Light-Controlled Mammalian Cells and Their  
787 Therapeutic Applications in Synthetic Biology, *Adv Sci (Weinh)* 6(1) (2018) 1800952-1800952.  
788 [10] L. Nissim, M.-R. Wu, E. Pery, A. Binder-Nissim, H.I. Suzuki, D. Stupp, C. Wehrspaun, Y. Tabach,  
789 P.A. Sharp, T.K. Lu, Synthetic RNA-Based Immunomodulatory Gene Circuits for Cancer

- 790 Immunotherapy, *Cell* 171(5) (2017) 1138-1150.e15.
- 791 [11] C. Chen, D. Yue, L. Lei, H. Wang, J. Lu, Y. Zhou, S. Liu, T. Ding, M. Guo, L. Xu, Promoter-Operating  
792 Targeted Expression of Gene Therapy in Cancer: Current Stage and Prospect, *Molecular Therapy -*  
793 *Nucleic Acids* 11 (2018) 508-514.
- 794 [12] X. Xie, L. Li, X. Xiao, J. Guo, Y. Kong, M. Wu, W. Liu, G. Gao, J.L. Hsu, W. Wei, M.-C. Hung, X. Xie,  
795 Targeted Expression of BikDD Eliminates Breast Cancer with Virtually No Toxicity in Noninvasive  
796 Imaging Models, *Molecular Cancer Therapeutics* 11(9) (2012) 1915-1924.
- 797 [13] J.Y. Qin, L. Zhang, K.L. Clift, I. Hular, A.P. Xiang, B.-Z. Ren, B.T. Lahn, Systematic Comparison of  
798 Constitutive Promoters and the Doxycycline-Inducible Promoter, *PLoS ONE* 5(5) (2010) e10611.
- 799 [14] S.J. Gray, S.B. Foti, J.W. Schwartz, L. Bachaboina, B. Taylor-Blake, J. Coleman, M.D. Ehlers, M.J.  
800 Zylka, T.J. McCown, R.J. Samulski, Optimizing promoters for recombinant adeno-associated virus-  
801 mediated gene expression in the peripheral and central nervous system using self-complementary  
802 vectors, *Human Gene Therapy* 22(9) (2011) 1143-1153.
- 803 [15] C. Rathnam, S.-T.D. Chueng, L. Yang, K.-B. Lee, Advanced Gene Manipulation Methods for Stem  
804 Cell Theranostics, *Theranostics* 7(11) (2017) 2775-2793.
- 805 [16] A. Klug, The Discovery of Zinc Fingers and Their Applications in Gene Regulation and Genome  
806 Manipulation, *Annual Review of Biochemistry* 79(1) (2010) 213-231.
- 807 [17] R. Moore, A. Chandras, L. Bleris, Transcription activator-like effectors: a toolkit for synthetic  
808 biology, *ACS Synthetic Biology* 3(10) (2014) 708-716.
- 809 [18] J.A. Doudna, E. Charpentier, The new frontier of genome engineering with CRISPR-Cas9,  
810 *Science* 346(6213) (2014) 1258096.
- 811 [19] T. Kim, T.K. Lu, CRISPR/Cas-based devices for mammalian synthetic biology, *Current Opinion in*  
812 *Chemical Biology* 52 (2019) 23-30.
- 813 [20] I. Sadowski, J. Ma, S. Triezenberg, M. Ptashne, GAL4-VP16 is an unusually potent transcriptional  
814 activator, *Nature* 335(6190) (1988) 563-564.
- 815 [21] R.R. Beerli, D.J. Segal, B. Dreier, C.F. Barbas, Toward controlling gene expression at will: Specific  
816 regulation of the erbB-2/HER-2 promoter by using polydactyl zinc finger proteins constructed from  
817 modular building blocks, *Proceedings of the National Academy of Sciences* 95(25) (1998) 14628-  
818 14633.
- 819 [22] A. Chavez, J. Scheiman, S. Vora, B.W. Pruitt, M. Tuttle, E. P R Iyer, S. Lin, S. Kiani, C.D. Guzman,  
820 D.J. Wiegand, D. Ter-Ovanesyan, J.L. Braff, N. Davidsohn, B.E. Housden, N. Perrimon, R. Weiss, J.  
821 Aach, J.J. Collins, G.M. Church, Highly efficient Cas9-mediated transcriptional programming, *Nat*  
822 *Meth* 12(4) (2015) 326-328.
- 823 [23] M. Pandelakis, E. Delgado, M.R. Ebrahimkhani, CRISPR-Based Synthetic Transcription Factors  
824 In Vivo: The Future of Therapeutic Cellular Programming, *Cell Systems* 10(1) (2020) 1-14.
- 825 [24] Luke A. Gilbert, Matthew H. Larson, L. Morsut, Z. Liu, Gloria A. Brar, Sandra E. Torres, N. Stern-  
826 Ginossar, O. Brandman, Evan H. Whitehead, Jennifer A. Doudna, Wendell A. Lim, Jonathan S.  
827 Weissman, Lei S. Qi, CRISPR-Mediated Modular RNA-Guided Regulation of Transcription in

- 828 Eukaryotes, *Cell* 154(2) (2013) 442-451.
- 829 [25] Marvin E. Tanenbaum, Luke A. Gilbert, Lei S. Qi, Jonathan S. Weissman, Ronald D. Vale, A  
830 Protein-Tagging System for Signal Amplification in Gene Expression and Fluorescence Imaging, *Cell*  
831 159(3) (2014) 635-646.
- 832 [26] S. Konermann, M.D. Brigham, A.E. Trevino, J. Joung, O.O. Abudayyeh, C. Barcena, P.D. Hsu, N.  
833 Habib, J.S. Gootenberg, H. Nishimasu, O. Nureki, F. Zhang, Genome-scale transcriptional activation  
834 by an engineered CRISPR-Cas9 complex, *Nature* 517(7536) (2015) 583-588.
- 835 [27] A. Chavez, M. Tuttle, B.W. Pruitt, B. Ewen-Campen, R. Chari, D. Ter-Ovanesyan, S.J. Haque, R.J.  
836 Cecchi, E.J.K. Kowal, J. Buchthal, B.E. Housden, N. Perrimon, J.J. Collins, G. Church, Comparison of  
837 Cas9 activators in multiple species, *Nat Meth* 13(7) (2016) 563-567.
- 838 [28] F. Farzadfard, S.D. Perli, T.K. Lu, Tunable and Multifunctional Eukaryotic Transcription Factors  
839 Based on CRISPR/Cas, *ACS Synthetic Biology* 2(10) (2013) 604-613.
- 840 [29] J.J. Havel, D. Chowell, T.A. Chan, The evolving landscape of biomarkers for checkpoint inhibitor  
841 immunotherapy, *Nature Reviews Cancer* 19(3) (2019) 133-150.
- 842 [30] L. Gaidukov, L. Wroblewska, B. Teague, T. Nelson, X. Zhang, Y. Liu, K. Jagtap, S. Mamo, W.A.  
843 Tseng, A. Lowe, J. Das, K. Bandara, S. Baijuraj, N.M. Summers, T.K. Lu, L. Zhang, R. Weiss, A multi-  
844 landing pad DNA integration platform for mammalian cell engineering, *Nucleic Acids Research* 46(8)  
845 (2018) 4072-4086.
- 846 [31] B. Jusiak, K. Jagtap, L. Gaidukov, X. Duportet, K. Bandara, J. Chu, L. Zhang, R. Weiss, T.K. Lu,  
847 Comparison of Integrases Identifies Bxb1-GA Mutant as the Most Efficient Site-Specific Integrase  
848 System in Mammalian Cells, *ACS Synthetic Biology* 8(1) (2019) 16-24.
- 849 [32] M. Fitzgerald, M. Livingston, C. Gibbs, T.L. Deans, Rosa26 docking sites for investigating genetic  
850 circuit silencing in stem cells, *Synthetic Biology* 5(1) (2020).
- 851 [33] P. Guye, Y. Li, L. Wroblewska, X. Duportet, R. Weiss, Rapid, modular and reliable construction of  
852 complex mammalian gene circuits, *Nucleic Acids Research* 41(16) (2013) e156.
- 853 [34] X. Duportet, L. Wroblewska, P. Guye, Y. Li, J. Eyquem, J. Rieders, T. Rimchala, G. Batt, R. Weiss, A  
854 platform for rapid prototyping of synthetic gene networks in mammalian cells, *Nucleic Acids*  
855 *Research* 42(21) (2014) 13440-13451.
- 856 [35] I. Barde, E. Laurenti, S. Verp, M. Wiznerowicz, S. Offner, A. Viorner, A. Galy, A. Trumpp, D.  
857 Trono, Lineage- and stage-restricted lentiviral vectors for the gene therapy of chronic  
858 granulomatous disease, *Gene Therapy* 18 (2011) 1087.
- 859 [36] P. Guye, M.R. Ebrahimkhani, N. Kipniss, J.J. Velazquez, E. Schoenfeld, S. Kiani, L.G. Griffith, R.  
860 Weiss, Genetically engineering self-organization of human pluripotent stem cells into a liver bud-like  
861 tissue using Gata6, *Nature Communications* 7(1) (2016) 10243.
- 862 [37] L. Cong, F.A. Ran, D. Cox, S. Lin, R. Barretto, N. Habib, P.D. Hsu, X. Wu, W. Jiang, L.A. Marraffini,  
863 F. Zhang, Multiplex Genome Engineering Using CRISPR/Cas Systems, *Science* 339(6121) (2013) 819-  
864 823.
- 865 [38] S.J. Cooper, N.D. Trinklein, E.D. Anton, L. Nguyen, R.M. Myers, Comprehensive analysis of

- 866 transcriptional promoter structure and function in 1% of the human genome, *Genome research*  
867 16(1) (2006) 1-10.
- 868 [39] A.B. Rose, Introns as Gene Regulators: A Brick on the Accelerator, *Frontiers in Genetics* 9(672)  
869 (2019).
- 870 [40] J.H. Kim, S.-R. Lee, L.-H. Li, H.-J. Park, J.-H. Park, K.Y. Lee, M.-K. Kim, B.A. Shin, S.-Y. Choi, High  
871 Cleavage Efficiency of a 2A Peptide Derived from Porcine Teschovirus-1 in Human Cell Lines,  
872 Zebrafish and Mice, *PLoS ONE* 6(4) (2011) e18556.
- 873 [41] M.C. Inniss, K. Bandara, B. Jusiak, T.K. Lu, R. Weiss, L. Wroblewska, L. Zhang, A novel Bxb1  
874 integrase RMCE system for high fidelity site-specific integration of mAb expression cassette in CHO  
875 Cells, *Biotechnology and Bioengineering* 114(8) (2017) 1837-1846.
- 876 [42] M. Jost, D.A. Santos, R.A. Saunders, M.A. Horlbeck, J.S. Hawkins, S.M. Scaria, T.M. Norman, J.A.  
877 Hussmann, C.R. Liem, C.A. Gross, J.S. Weissman, Titrating gene expression using libraries of  
878 systematically attenuated CRISPR guide RNAs, *Nature Biotechnology* 38(3) (2020) 355-364.
- 879 [43] J.M. Leavitt, H.S. Alper, Advances and current limitations in transcript-level control of gene  
880 expression, *Current Opinion in Biotechnology* 34 (2015) 98-104.
- 881 [44] A.J. Brown, S.J. Gibson, D. Hatton, D.C. James, In silico design of context-responsive mammalian  
882 promoters with user-defined functionality, *Nucleic Acids Research* 45(18) (2017) 10906-10919.
- 883 [45] A. Raj, C.S. Peskin, D. Tranchina, D.Y. Vargas, S. Tyagi, Stochastic mRNA Synthesis in Mammalian  
884 Cells, *PLOS Biology* 4(10) (2006) e309.
- 885 [46] Y. Qian, H.-H. Huang, J.I. Jiménez, D. Del Vecchio, Resource Competition Shapes the Response of  
886 Genetic Circuits, *ACS Synthetic Biology* 6(7) (2017) 1263-1272.
- 887 [47] A.C. Wilkinson, H. Nakauchi, B. Göttgens, Mammalian Transcription Factor Networks: Recent  
888 Advances in Interrogating Biological Complexity, *Cell Systems* 5(4) (2017) 319-331.
- 889 [48] X. Xu, J. Gao, W. Dai, D. Wang, J. Wu, J. Wang, Gene activation by a CRISPR-assisted trans  
890 enhancer, *eLife* 8 (2019) e45973.
- 891 [49] Mariati, S.C.L. Ho, M.G.S. Yap, Y. Yang, Evaluating post-transcriptional regulatory elements for  
892 enhancing transient gene expression levels in CHO K1 and HEK293 cells, *Protein Expression and*  
893 *Purification* 69(1) (2010) 9-15.
- 894 [50] T. Choi, M. Huang, C. Gorman, R. Jaenisch, A generic intron increases gene expression in  
895 transgenic mice, *Molecular and Cellular Biology* 11(6) (1991) 3070-3074.
- 896 [51] O. Shaul, How introns enhance gene expression, *The International Journal of Biochemistry &*  
897 *Cell Biology* 91 (2017) 145-155.
- 898 [52] J. Cao, E.M. Novoa, Z. Zhang, W.C.W. Chen, D. Liu, G.C.G. Choi, A.S.L. Wong, C. Wehrspaun, M.  
899 Kellis, T.K. Lu, High-throughput 5' UTR engineering for enhanced protein production in non-viral  
900 gene therapies, *Nature Communications* 12(1) (2021) 4138.
- 901 [53] G. Walsh, Biopharmaceutical benchmarks 2018, *Nature Biotechnology* 36 (2018) 1136.
- 902 [54] Z. Yang, S. Wang, A. Halim, M.A. Schulz, M. Frodin, S.H. Rahman, M.B. Vester-Christensen, C.  
903 Behrens, C. Kristensen, S.Y. Vakhrushev, E.P. Bennett, H.H. Wandall, H. Clausen, Engineered CHO cells



904 for production of diverse, homogeneous glycoproteins, *Nature Biotechnology* 33 (2015) 842.  
 905 [55] A.J. Brown, D.C. James, Precision control of recombinant gene transcription for CHO cell  
 906 synthetic biology, *Biotechnology Advances* 34(5) (2016) 492-503.  
 907 [56] N. Romanova, T. Noll, Engineered and Natural Promoters and Chromatin-Modifying Elements  
 908 for Recombinant Protein Expression in CHO Cells, *Biotechnology Journal* 13(3) (2017) 1700232.  
 909 [57] J.S. Lee, J.H. Park, T.K. Ha, M. Samoudi, N.E. Lewis, B.O. Palsson, H.F. Kildegaard, G.M. Lee,  
 910 Revealing Key Determinants of Clonal Variation in Transgene Expression in Recombinant CHO Cells  
 911 Using Targeted Genome Editing, *ACS Synthetic Biology* 7(12) (2018) 2867-2878.

912  
 913  
 914  
 915  
 916  
 917

## Figures and Figure Legends

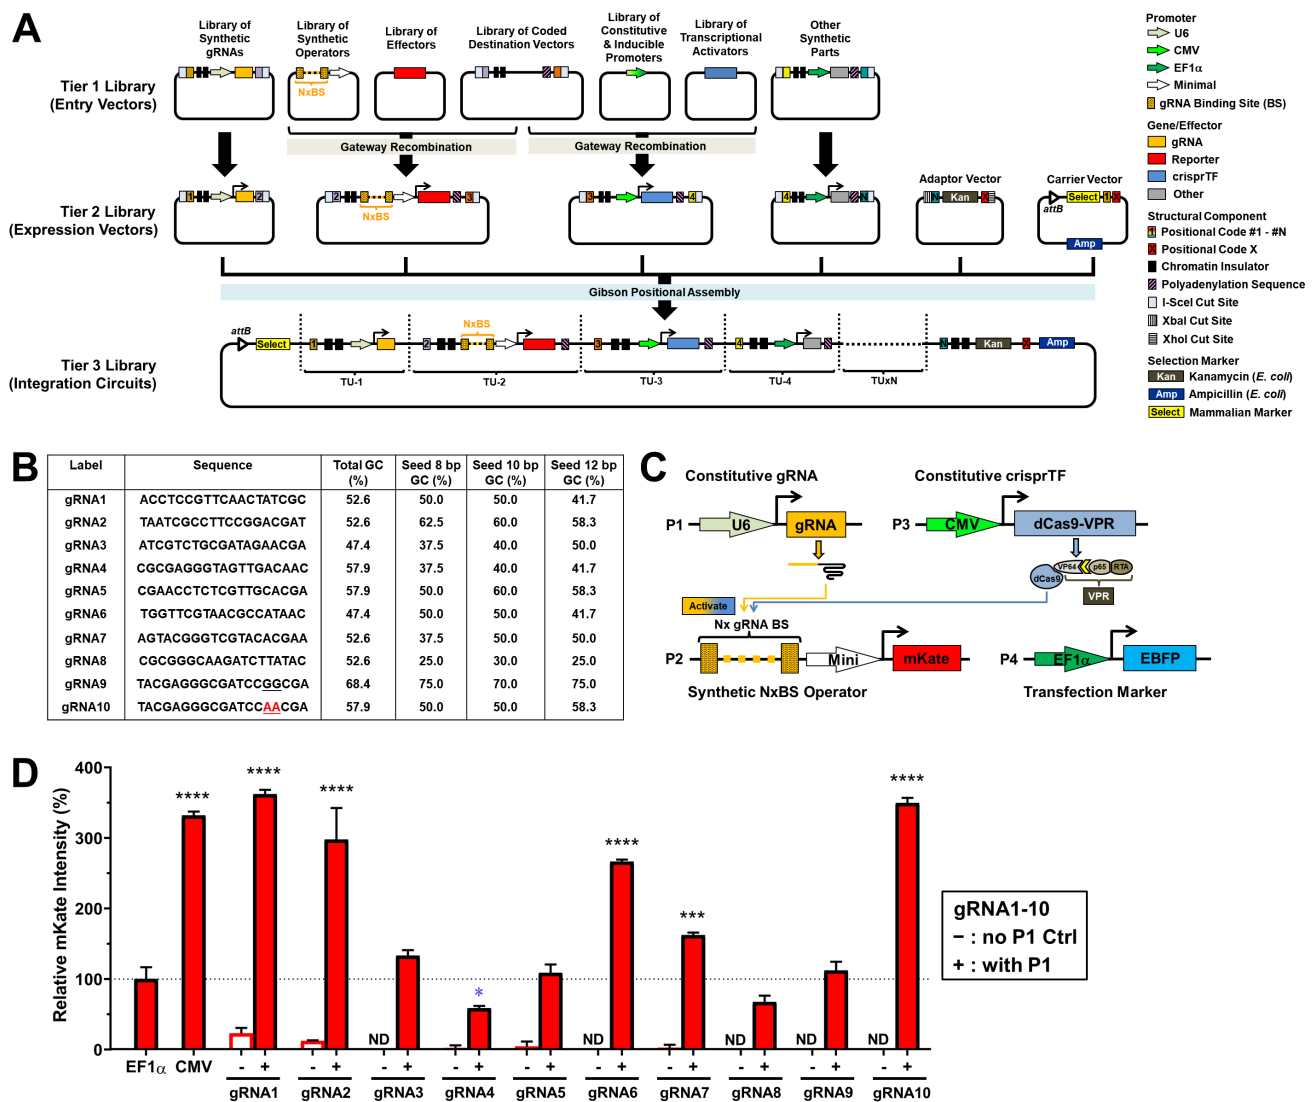

918  
 919 **Figure 1. Design and development of the crisprTF promoter system.**

920 **(A)** Schematic illustration of the programmable and modular design of the crisprTF-based  
921 transcription system. To increase its programmability, this platform was modularly divided into 3 tiers  
922 of libraries constructed with the Gateway-Gibson cloning approach. The Tier 1 library was composed  
923 of entry vector modules separately encoding gRNAs, synthetic operators with gRNA binding sites (BS)  
924 upstream of a minimal promoter, effector genes, crisprTFs and their associated promoters, and other  
925 transcriptional control elements. Tier 1 library units were assembled into positional expression vectors  
926 with pre-defined orders by Gateway cloning, forming the Tier 2 library. Positional assembly by Gibson  
927 cloning was performed to connect independent transcriptional units (TUs), derived from positional  
928 expression vectors in the Tier 2 library by I-SceI restriction digestion, into complete gene circuits. The  
929 Tier 3 library comprised integration circuits enabling precision control of the target gene(s) when  
930 integrated into a landing pad (i.e., a designated chromosomal safe harbor) with BxB1 integrase-  
931 mediated, site-specific chromosomal integration. **(B)** Ten gRNAs (gRNA1-10) orthogonal to the CHO  
932 genome were screened for expression. gRNA10 was modified from gRNA9 with GG-to-AA mutations  
933 to reduce the GC content of the seed and the entire sequences. **(C)** To evaluate episomal gene  
934 expression levels, CHO-K1 cells were transiently transfected with four plasmids: plasmid #1 (P1)  
935 constitutively expressing gRNA; plasmid #2 (P2) encoding the synthetic operator with some number  
936 (x) of gRNA BS to drive mKate expression; plasmid #3 (P3) constitutively expressing a crisprTF; and  
937 plasmid #4 (P4) constitutively expressing the transfection marker (EBFP). mKate signals were  
938 assessed at 48 hours post-transfection. **(D)** For the gRNA screening, each gRNA was paired with a  
939 matching synthetic operator containing 8x gRNA BS to control mKate expression. EF1 $\alpha$  and CMV  
940 promoters driving mKate expression served as positive controls. Experimental groups (+),  
941 represented by red solid bars, were transfected with four plasmids (P1-P4). Control groups (-),  
942 represented by red hollow bars, to detect baseline operator leakage were transfected without P1 (P2-  
943 P4). Data were normalized to the EF1 $\alpha$  control and are presented as relative median mKate intensity  
944 (%). gRNA1 and gRNA2 operators exhibited notable leakage without gRNA, suggesting non-specific  
945 transcriptional activities that were not associated with targeted crisprTF binding. Data represent the  
946 mean  $\pm$  SD (n = 3) (one-way ANOVA with multiple comparisons corrected by Dunnett test; \* $p$ <0.05,  
947 \*\*\* $p$ <0.001, \*\*\*\* $p$ <0.0001; ND: not detected).

948  
949  
950  
951  
952  
953  
954  
955  
956  
957

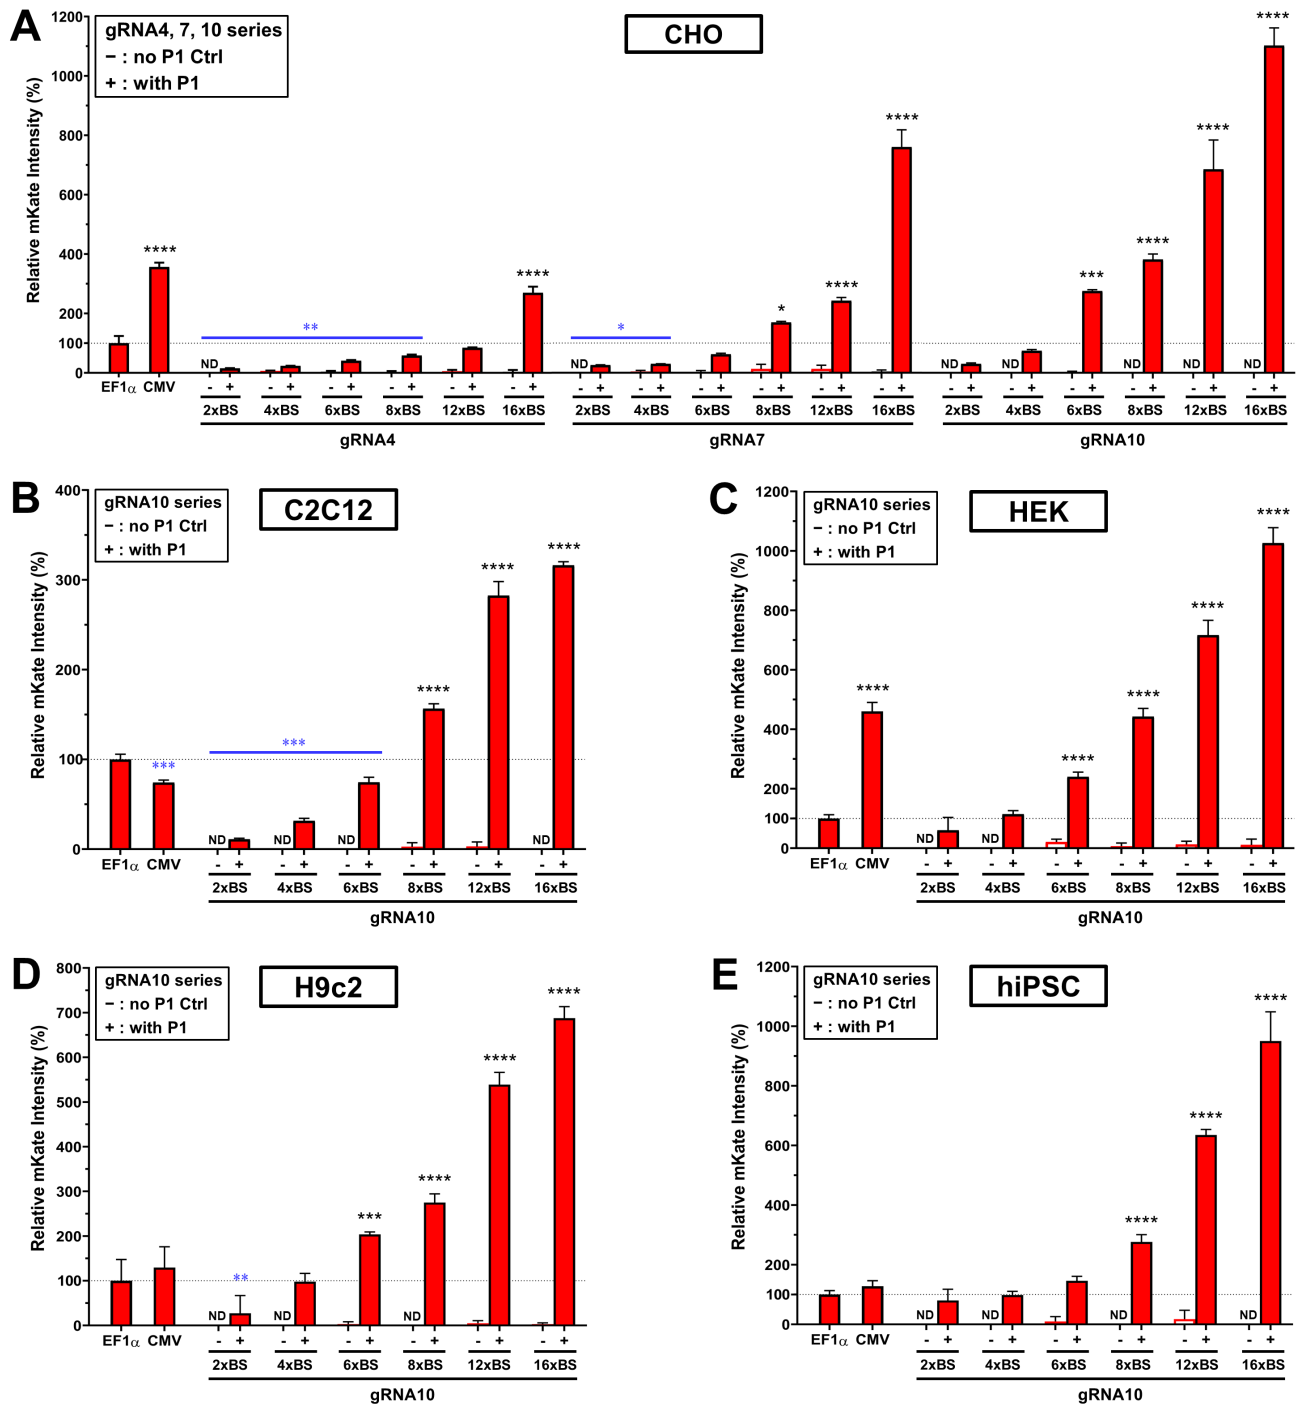

958

959 **Figure 2. Gene expression programmed by the number of gRNA BS in synthetic operators.**

960 A library of gRNA4, 7, and 10 synthetic operators containing 2x-16x gRNA BS was built to assess the  
 961 number of gRNA BS that would be effective as a programmable parameter in controlling gene  
 962 expression levels. Experimental groups (+), represented by red solid bars, were transiently  
 963 transfected with four plasmids (P1-P4 in **Figure 1C**) whereas gRNA-free control groups (-),  
 964 represented by paired red hollow bars, were transfected without P1 (only P2-P4 in **Figure 1C**) to  
 965 detect operator leakage. EF1 $\alpha$  and CMV promoters served as positive controls. Median mKate  
 966 signals relative to the EF1 $\alpha$  control were analyzed at 48 hours post-transfection with flow cytometry.

967 **(A)** Synthetic operators of the gRNA4, 7, and 10 series with 2x-16x BS were examined in CHO-K1  
968 cells. **(B-E)** Synthetic operators of the gRNA10 series with 2x-16x BS were tested in mouse C2C12  
969 myoblasts **(B)**, human HEK293T cells **(C)**, rat H9C2 cardiomyoblast cells **(D)**, and hiPSCs **(E)**. Data  
970 represent the mean  $\pm$  SD (n = 3) (one-way ANOVA with multiple comparisons corrected by Dunnett  
971 test; for increased expression (marked in black): \* $p \leq 0.05$ ; \*\*\* $p \leq 0.001$ ; \*\*\*\* $p \leq 0.0001$ ; for decreased  
972 expression (marked in blue): \* $p \leq 0.05$ ; \*\* $p \leq 0.01$ ; \*\*\* $p \leq 0.001$ ; ND: not detected).

973

974

975

976

977

978

979

980

981

982

983

984

985

986

987

988

989

990

991

992

993

994

995

996

997

998

999

1000

1001

1002

1003

1004

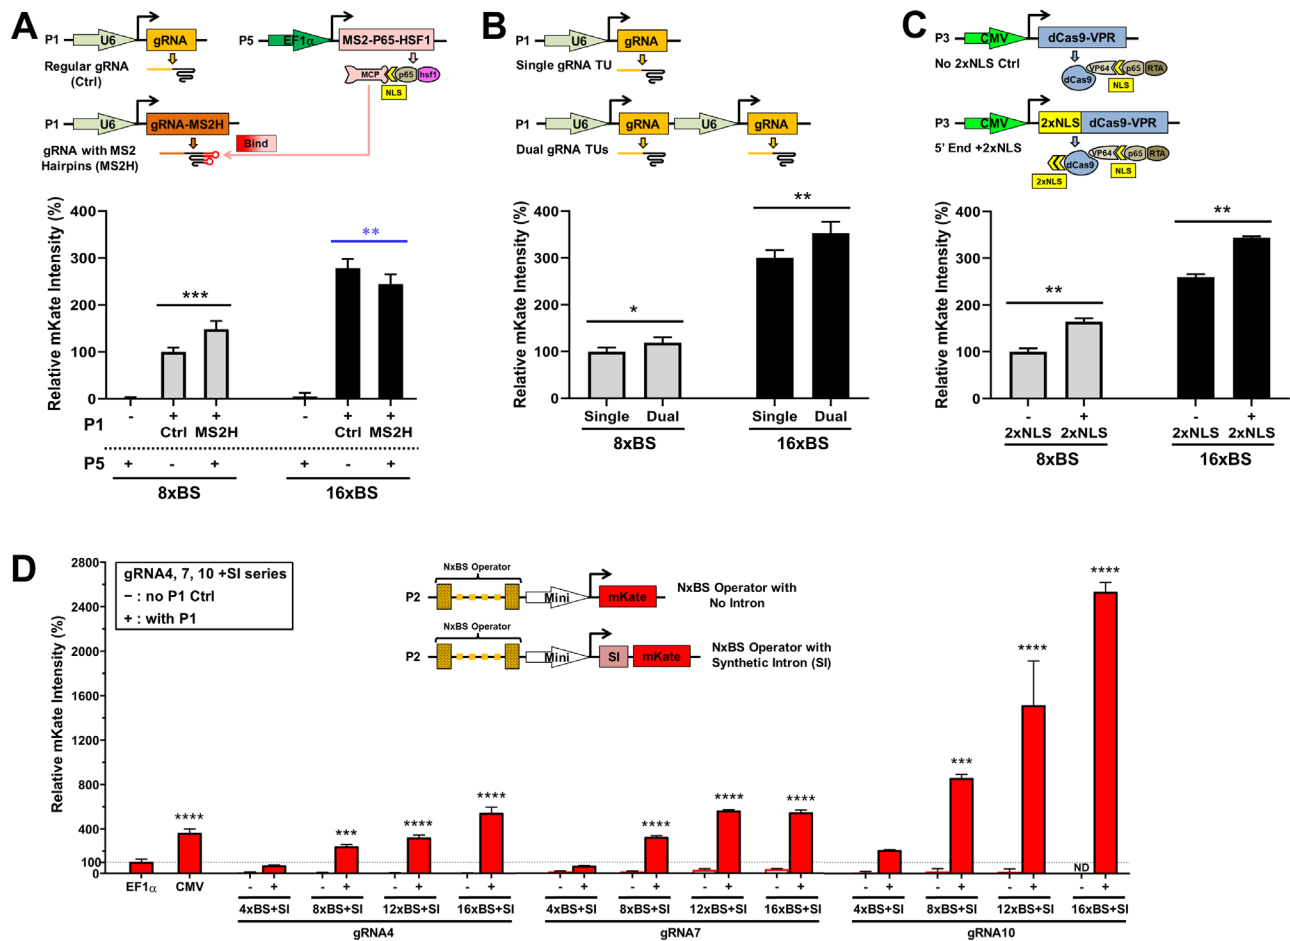

**Figure 3. Genetic control elements added to maximize the expression level of the target gene.**

Schematic illustrations depicting individual experiments exhibit only plasmid constructs that were different from P1-P4 in **Figure 1C**. Additional genetic control elements were incorporated into the crisprTF promoters (A, B, C, and D). **(A)** Synergistic activation mediator (SAM). dCas9-VPR was combined with SAM, another strong synthetic transcriptional activator. Two-tailed paired Student's *t*-test was performed to compare P1(+) groups. **(B)** Dual gRNA transcriptional units (TUs). An extra gRNA10 TU was added to increase gRNA expression (two-tailed paired Student's *t*-test). **(C)** An additional 2x nuclear localizing sequence (NLS) in the crisprTF was added at the 5' end of dCas9-VPR (two-tailed paired Student's *t*-test). **(D)** A synthetic intron (SI) was added at the 5' UTR of the target gene. The SI was incorporated into four synthetic operators of the gRNA4, 7, and 10 series (4x, 8x, 12x, and 16x BS), respectively. Experimental groups (+) were transiently transfected with four or five plasmids (P1-P4 or P1-P5), whereas negative controls (-) were transfected without P1. Red solid bars represent experimental groups (+); paired red hollow bars represent corresponding control groups without gRNA (-) (one-way ANOVA with multiple comparisons corrected by Dunnett test). All data represent the mean  $\pm$  SD ( $n = 3$ ); (for increased expression marked in black: \* $p \leq 0.05$ ; \*\* $p \leq 0.01$ ; \*\*\* $p \leq 0.001$ ; \*\*\*\* $p \leq 0.0001$ ; for decreased expression marked in blue: \*\* $p \leq 0.01$ ; ND: not detected).

1005

1006

1007

1008

1009

1010

1011

1012

1013

1014

1015

1016

1017

1018

1019

1020

1021

1022

1023

## A Adherent CHO Cells with Single Landing Pad (sLP)

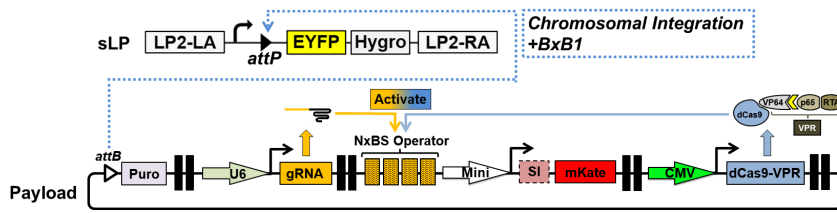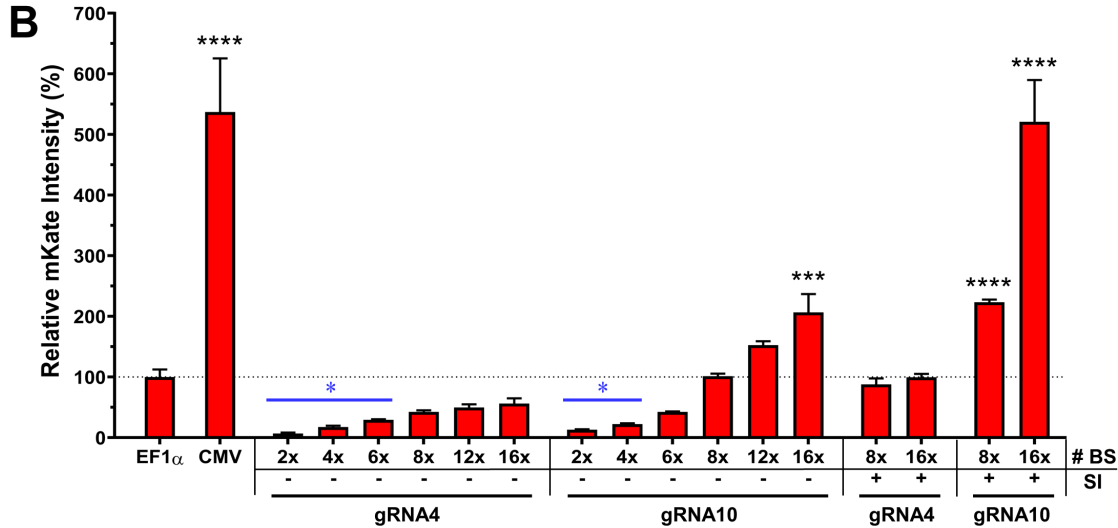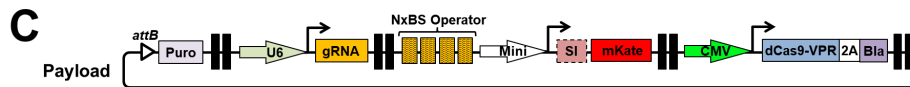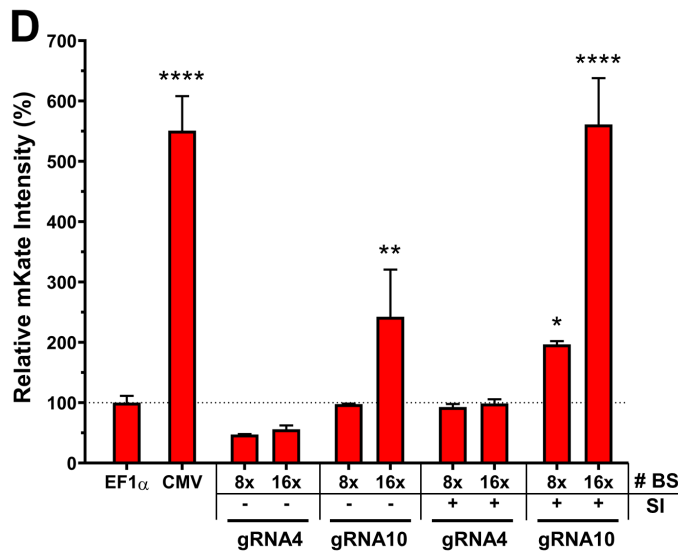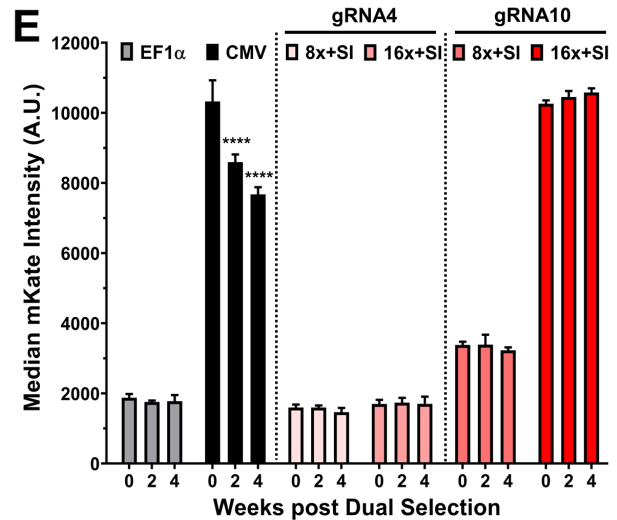

1024

1025

1026

1027

1028

1029

1030

**Figure 4. Genomic integration and long-term precision gene expression in CHO landing pad cells.** (A) A schematic illustration of an integration gene circuit and BxB1 recombinase-mediated, site-specific integration in an engineered, adherent CHO cell line with a single landing pad (sLP). Positive integration control circuits had a central TU with an EF1 $\alpha$  or CMV promoter driving mKate expression and two flanking dummy TUs with no gene expression in the same architecture. (B) The mKate signal intensities of the chromosomally integrated crisprTF promoter circuits in sLP-CHO cells relative to the

1031 integrated EF1 $\alpha$  control circuit (one-way ANOVA with multiple comparisons corrected by Dunnett test).  
1032 **(C)** A schematic illustration of an integration circuit with the addition of a 3' flanking selection marker  
1033 (blasticidin) into dCas-VPR, linked by a 2A self-cleavage peptide, to increase stability of target gene  
1034 expression in long-term culture. A number of integration circuits from the gRNA4 and gRNA10 series  
1035 were selected for the modification. **(D)** The mKate signal intensities of the chromosomally integrated  
1036 crisprTF promoter circuits after dual selection with puromycin and blasticidin (one-way ANOVA with  
1037 multiple comparisons corrected by Dunnett test). **(E)** The mKate expression levels with two of the  
1038 strongest circuits from each gRNA series over the course of 4 weeks following dual selection. All four  
1039 circuits examined displayed no noteworthy change in mKate signals at 2 or 4 weeks (all  $p > 0.05$ ),  
1040 similar to the EF1 $\alpha$  control (two-way ANOVA with multiple comparisons corrected by Dunnett test). All  
1041 data represent the mean  $\pm$  SD (n = 3) (\* $p < 0.05$ , \*\* $p < 0.01$ , \*\*\* $p < 0.001$ , \*\*\*\* $p < 0.0001$ ).

1042  
1043  
1044  
1045  
1046  
1047  
1048  
1049  
1050  
1051  
1052  
1053  
1054  
1055  
1056  
1057  
1058  
1059  
1060  
1061  
1062  
1063  
1064  
1065  
1066

### A Adherent CHO Cells with Double Landing Pad (dLP)

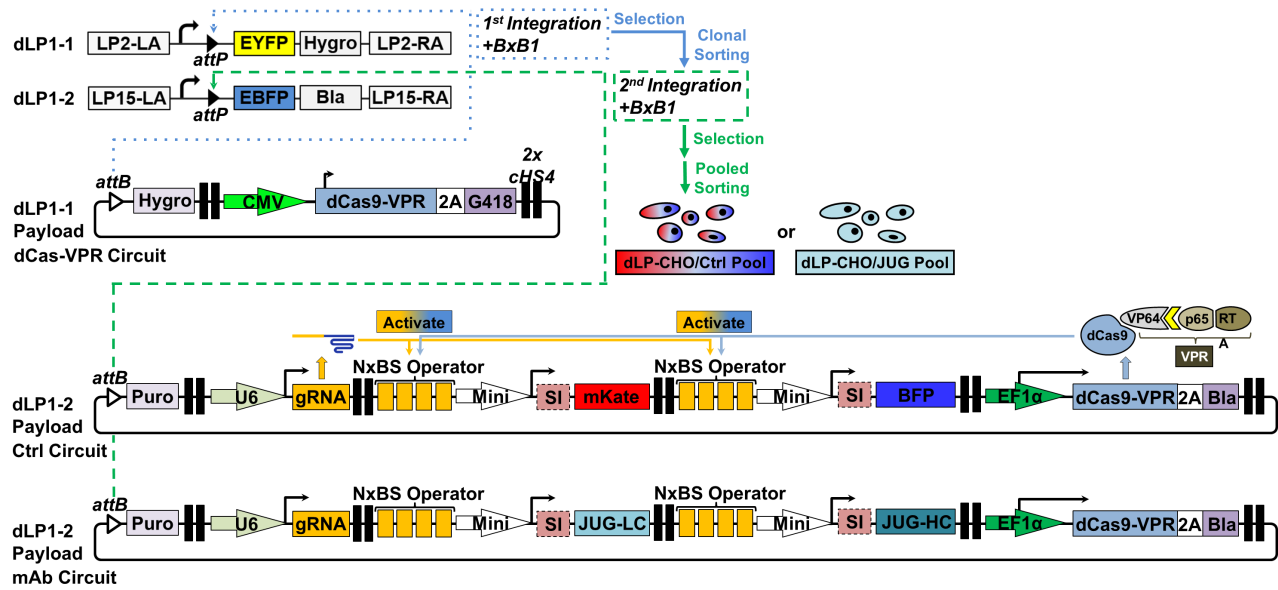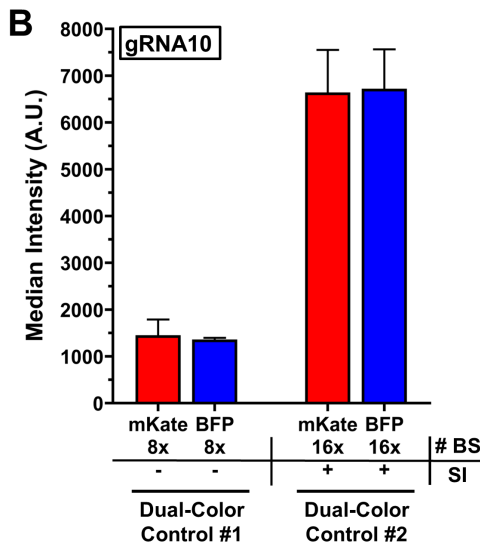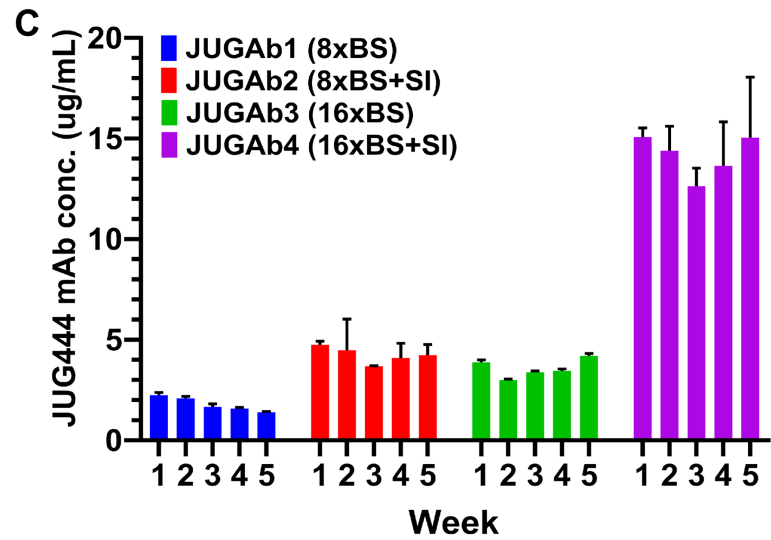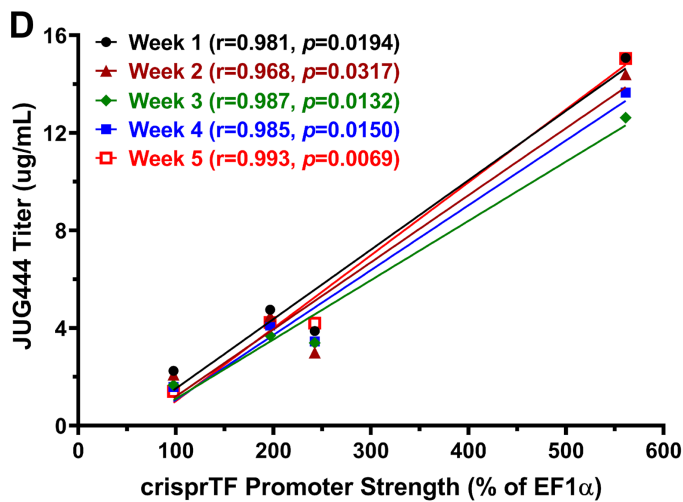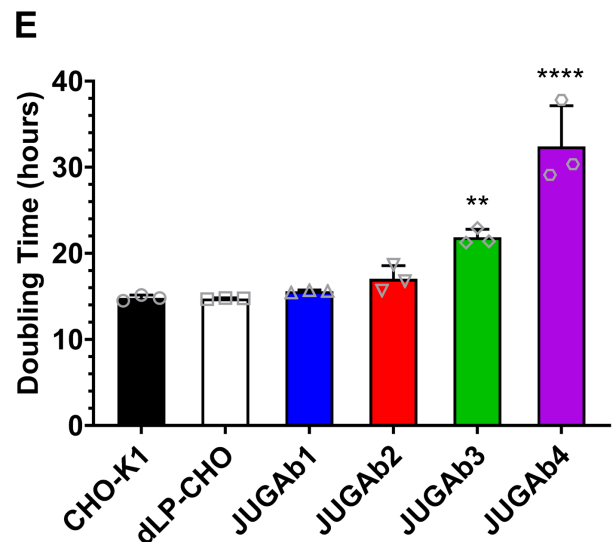



1068 **Figure 5. Precision control of human monoclonal antibody (mAb) production.**

1069 **(A)** Schematic illustrations of the sequential, site-specific genomic integration of two payload gene  
1070 circuits into the CHO cells engineered with a double landing pad (dLP) for human mAb production.  
1071 First, a synthetic gene circuit encoding one copy of dCas9-VPR and 2 flanking mammalian selection  
1072 markers, hygromycin (5' end) and G418 (3' end), was integrated into dLP1-1 site with BxB1 integrase.  
1073 Selected cells with single dLP1-1 occupancy were clonally sorted based on EYFP-/EBFP+ signals. A  
1074 single clone with the most consistent outputs of dCas9-VPR and EBFP was chosen for the second  
1075 BxB1-mediated integration targeting the free dLP1-2 site. The second integration gene circuit  
1076 contained independent TUs encoding either mKate and BFP reporter genes (control circuit) or the  
1077 light chain and heavy chain of a human mAb JUG444 (mAb circuit) as well as gRNA10, dCas9-VPR,  
1078 and two additional flanking selection markers: puromycin (5' end) and blasticidin (3' end). Integrated  
1079 cells selected with four antibiotics were then pool-sorted based on EYFP-/EBFP- signals. **(B)** The  
1080 mKate and TagBFP expression of the integrated payload control circuits in dLP-CHO cells with two  
1081 distinct configurations (8x BS without SI and 16x BS with SI). **(C)** The mAb production of the integrated  
1082 payload circuits to express the light chain and heavy chain of JUG444 with four gRNA10 operator  
1083 configurations: JUGAb1 (8x BS), JUGAb2 (8x BS with SI), JUGAb3 (16x BS), and JUGAb4 (16x BS  
1084 with SI). Octet mAb titer quantitation over five weeks showed stable, differential JUG444 production  
1085 by all four integration circuits. **(D)** Pearson correlation analysis to determine the relationship between  
1086 JUG444 mAb titers and crisprTF promoter strengths over the course of five weeks. The Pearson  
1087 correlation coefficients ( $r$ ) at Week 1 through Week 5 were:  $r=0.98$  ( $R^2=0.96$ ,  $p=0.0194$ ),  $r=0.97$   
1088 ( $R^2=0.94$ ,  $p=0.0317$ ),  $r=0.99$  ( $R^2=0.97$ ,  $p=0.0132$ ),  $r=0.99$  ( $R^2=0.97$ ,  $p=0.015$ ), and  $r=0.99$  ( $R^2=0.99$ ,  
1089  $p=0.0069$ ), respectively. **(E)** The doubling time of mAb-producing cell lines. All data represent the  
1090 mean  $\pm$  SD ( $n = 3$ ) (one-way ANOVA with multiple comparisons corrected by Dunnett test;  $**p<0.01$ ,  
1091  $****p<0.0001$ ).

1092

1093

1094

1095

1096

1097

1098

1099

1100

1101

1102

1103

1104

1105

### A Adherent CHO Cells with Double Landing Pad (dLP)

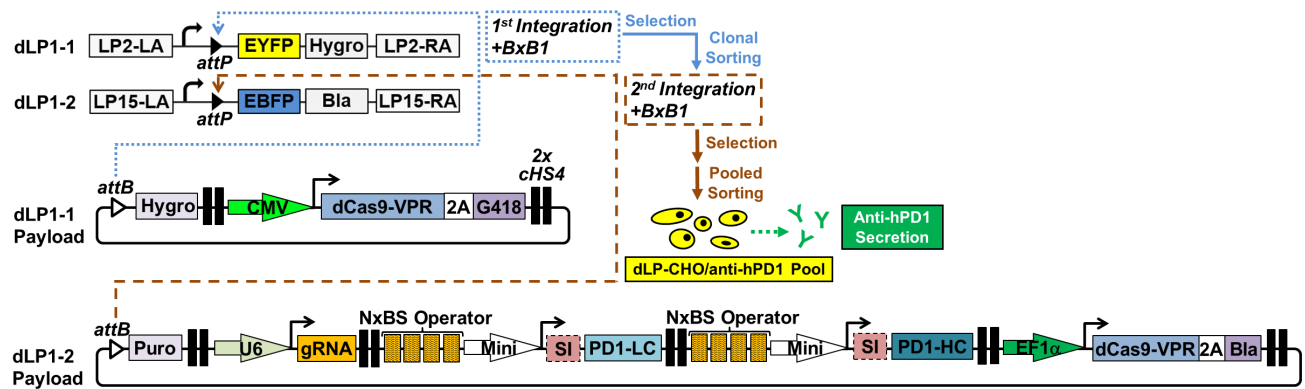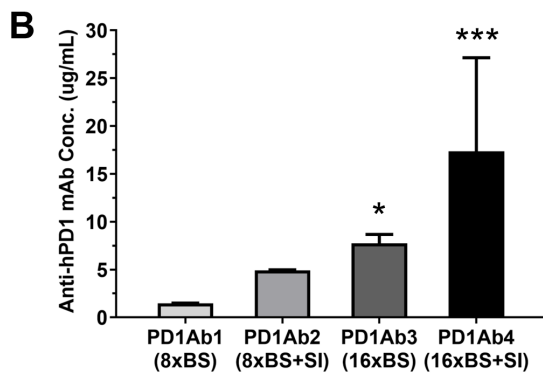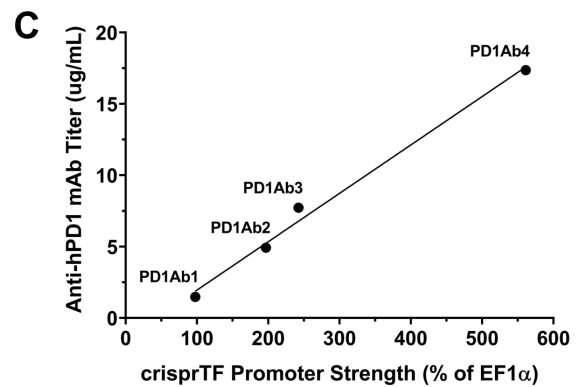

### D dLP-CHO/anti-hPD1 + Tumor cells + T cells Co-culture Model

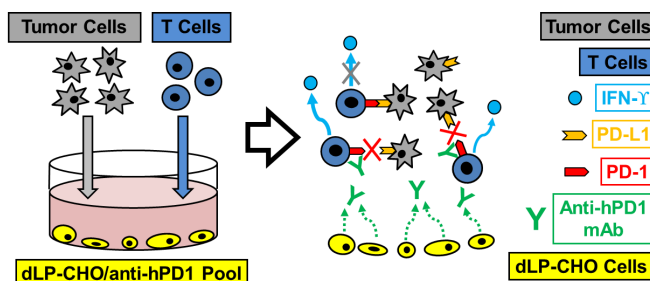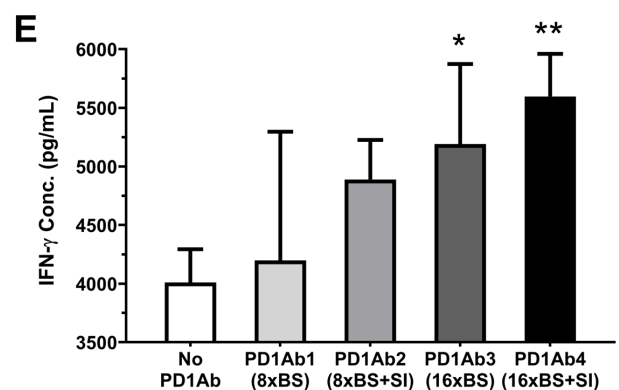

**Figure 6. Programmable control of anti-hPD1 secretion and the human T cell anti-tumor response.**

(A) Schematic illustration of engineering the anti-hPD1-secreting dLP-CHO cells with sequential and site-specific integration of two payload gene circuits with BxB1 integrase. Clonally sorted EYFP-/EBFP+ dLP-CHO cells stably integrated a gene circuit encoding dCas9-VPR and flanking selection markers in the dLP1-1 site were used for the second BxB1-mediated integration. The free dLP1-2 site was integrated with a gene circuit containing independent TUs that encoded: the 5' flanking puromycin, gRNA10, the light chain and heavy chain of anti-hPD1 driven by the same gRNA10 operators, dCas9-VPR, and the 3' flanking blasticidin linked to dCas9-VPR by a 2A self-cleavage peptide. Dually integrated cells were selected with four antibiotics and then subjected to pooled cell sorting based on EYFP-/EBFP- signals. (B) Octet mAb titer quantitation showed

1118 differential anti-hPD1 secretion programmed by four distinct configurations of gRNA10 operators:  
1119 PD1Ab1 (8x BS), PD1Ab2 (8x BS with SI), PD1Ab3 (16x BS), and PD1Ab4 (16x BS with SI) (one-  
1120 way ANOVA mixed effects analysis with multiple comparisons corrected by Tukey test). **(C)** Pearson  
1121 correlation analysis revealed that anti-hPD1 titers strongly correlated with crisprTF promoter strengths  
1122 ( $r=0.99$ ,  $R^2=0.99$ ,  $p=0.0043$ ). **(D)** Schematic diagram of CHO-tumor-T cell co-culture system to  
1123 evaluate the functionality of anti-hPD1 and to explore the utility of our crisprTF promoter platform for  
1124 cellular therapy. dLP-CHO cells engineered with one of the above four configurations for anti-hPD1  
1125 secretion were first seeded for 48 hours. The control group was seeded with EYFP-/EBFP+ dLP-CHO  
1126 cells with no anti-hPD1 payload circuit. Pre-activated human T cells and human ovarian cancer cells  
1127 (OVCAR8) expressing a surface T-cell engager were subsequently seeded in each well with the  
1128 attached dLP-CHO cell populations. **(E)** Quantification of IFN- $\gamma$  concentrations in the media at 24  
1129 hours post-co-culture by ELISA revealed tunable IFN- $\gamma$  production by T cells (one-way ANOVA with  
1130 multiple comparisons corrected by Dunnett test). All data represent the mean  $\pm$  SD ( $n = 3$ )(\* $p < 0.05$ ,  
1131 \*\* $p < 0.01$ , \*\*\* $p < 0.001$ ).

1132

1133

1134

1135

1136

1137

1138

1139

1140

1141

1142

1143

1144

1145

1146

1147

1148

1149

1150

1151

1152

1153

1154

1155

1156 **Supplemental Figures and Figure Legends**

1157

1158

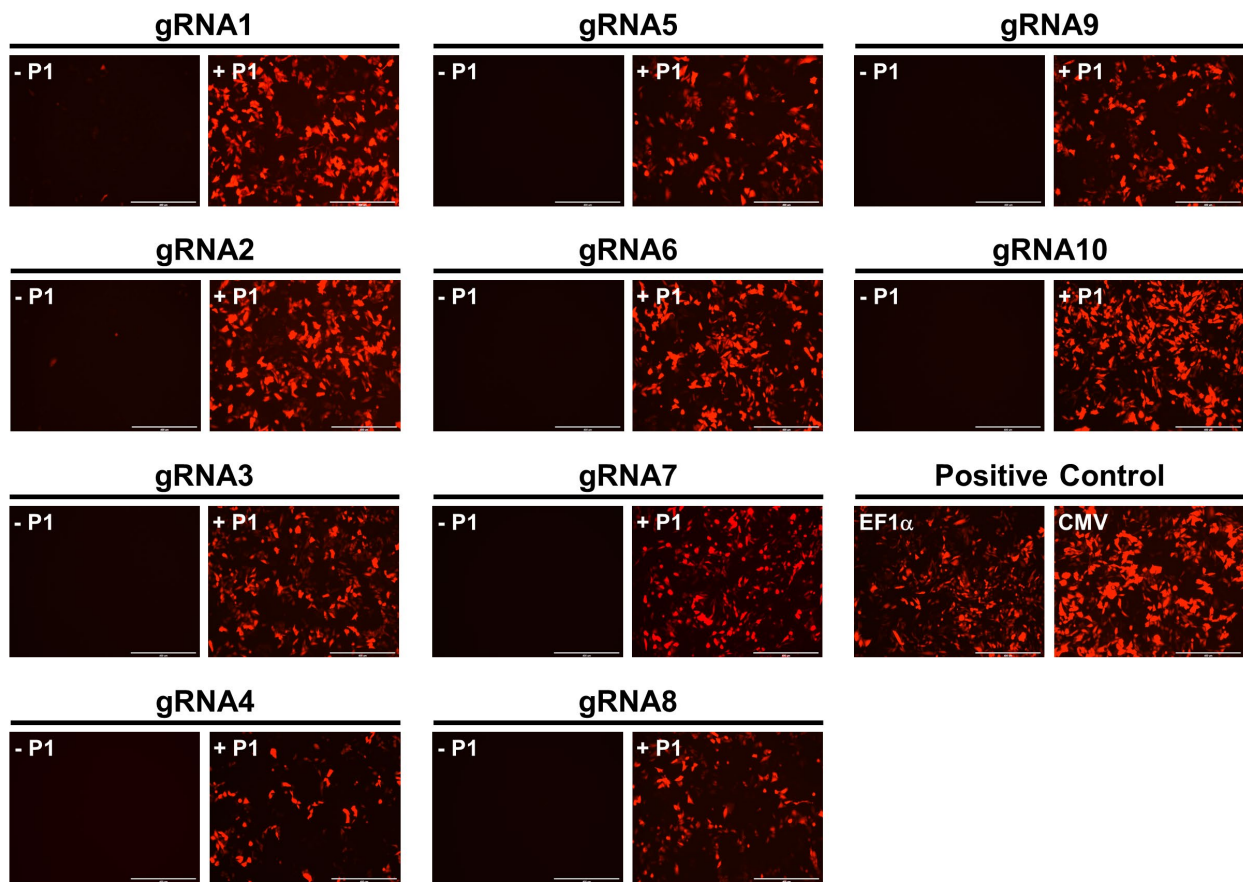

1159

1160 **Supplemental Figure 1. Comparison of episomal gene expression levels with 10 distinct gRNA**  
1161 **sequences.** Each gRNA was paired with a corresponding synthetic operator containing 8x gRNA BS  
1162 to control mKate transcription. CHO-K1 cells were transiently transfected as illustrated in **Figure 1C**,  
1163 with gRNA constitutively expressed by the U6 promoter from plasmid #1 (P1). Experimental groups  
1164 were transfected with all 4 plasmids, including P1 (**+ P1**); negative control groups (no gRNA) were  
1165 transfected without P1 (**- P1**). Plasmids with mKate expression driven by constitutive promoters (EF1 $\alpha$   
1166 or CMV), transfected at the same concentration, served as positive controls. Positive and negative  
1167 control groups were also supplemented with a dummy plasmid to ensure that all groups had the same  
1168 total amount of transfected plasmids. Representative fluorescent images revealed a wide range of  
1169 mKate expression among the 10 different gRNAs at 48 hours post-transfection. Only gRNA1 and  
1170 gRNA2 exhibited slight leakage of mKate expression without the presence of P1.

1171

1172

1173

1174

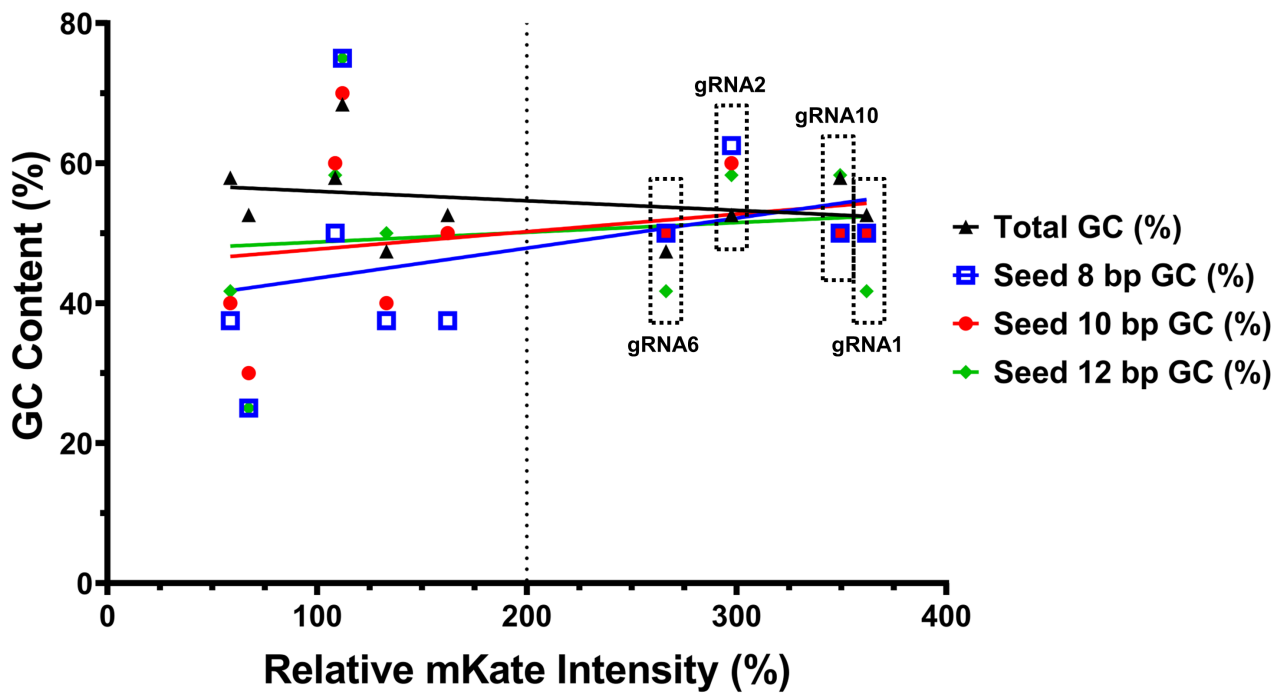

1175

1176 **Supplemental Figure 2. Analysis of the correlation between GC content in gRNA seed**  
1177 **sequences and gene expression levels.** We analyzed the relationship between GC content in gRNA  
1178 seed 8, 10, and 12 bp sequences and corresponding mKate expression levels among gRNA1-10.  
1179 Overall, gRNA1, 2, 6, and 10, which exhibited high mKate expression levels (>200% of EF1 $\alpha$   
1180 promoter), all had 50-60% GC content in gRNA seed sequences, especially within seed 8-10 bp.

1181

1182

1183

1184

1185

1186

1187

1188

1189

1190

1191

1192

1193

1194

1195

1196

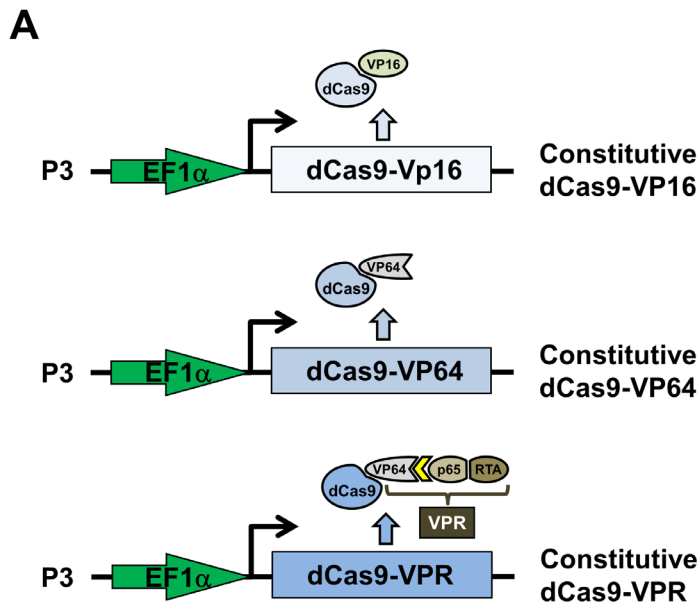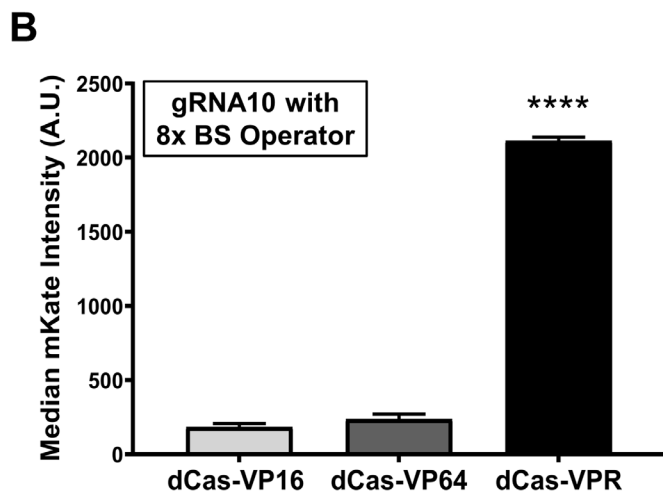

1197

1198

1199

1200

1201

1202

1203

1204

1205

1206

1207

1208

1209

1210

1211

**Supplemental Figure 3. Comparison of gene expression levels obtained with 3 crisperTFs.** mKate expression levels were compared for three crisperTFs: dCas-VP16, dCas-VP64, and dCas-VPR, with gRNA10 (P1) and its 8x BS synthetic operator (P2) as depicted in **Figure 1C**. **(A)** Schematic illustration of three versions of plasmid #3 (P3) respectively encoding the three crisperTFs composed of deactivated SpCas9 (dCas9) and transcriptional activation domains (TADs): dCas-VP16, dCas-VP64, and dCas-VPR. **(B)** FACS results showed that dCas-VPR had markedly higher median mKate expression than dCas-VP16 (11.5 fold,  $p < 0.0001$ ) and dCas-VP64 (9 fold,  $p < 0.0001$ ). Data were presented as median mKate intensity of the entire transfected population with artificial units (A.U.). Data represent the mean  $\pm$  SD ( $n = 3$ ) (one-way ANOVA with multiple comparisons corrected by Dunnett test; \*\*\*\* $p < 0.0001$ ).

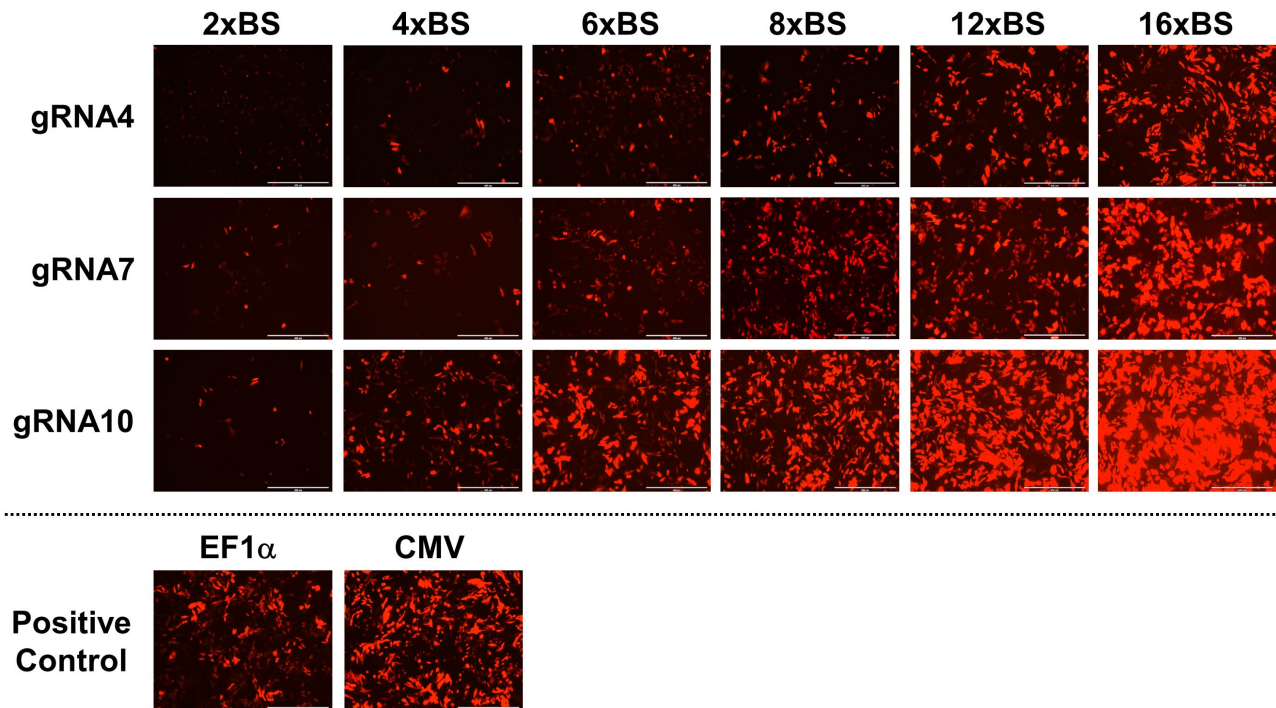

1212

1213 **Supplemental Figure 4. Comparison of gene expression levels with 6 distinct synthetic**  
1214 **operators containing different numbers of gRNA BS in three gRNA series.** CHO-K1 cells were  
1215 transfected as illustrated in **Figure 1C**, with each gRNA constitutively expressed by the U6 promoter  
1216 from Plasmid #1 (P1) and mKate expressed by each synthetic operator from Plasmid #2 (P2). mKate  
1217 expression driven by EF1 $\alpha$  and CMV promoters served as positive controls. Representative  
1218 fluorescent images showed a dramatic range of mKate expression among 6 synthetic operators in all  
1219 three gRNA series at 48 hours post-transfection, especially in the gRNA10 series.

1220

1221

1222

1223

1224

1225

1226

1227

1228

1229

1230

1231

1232

1233

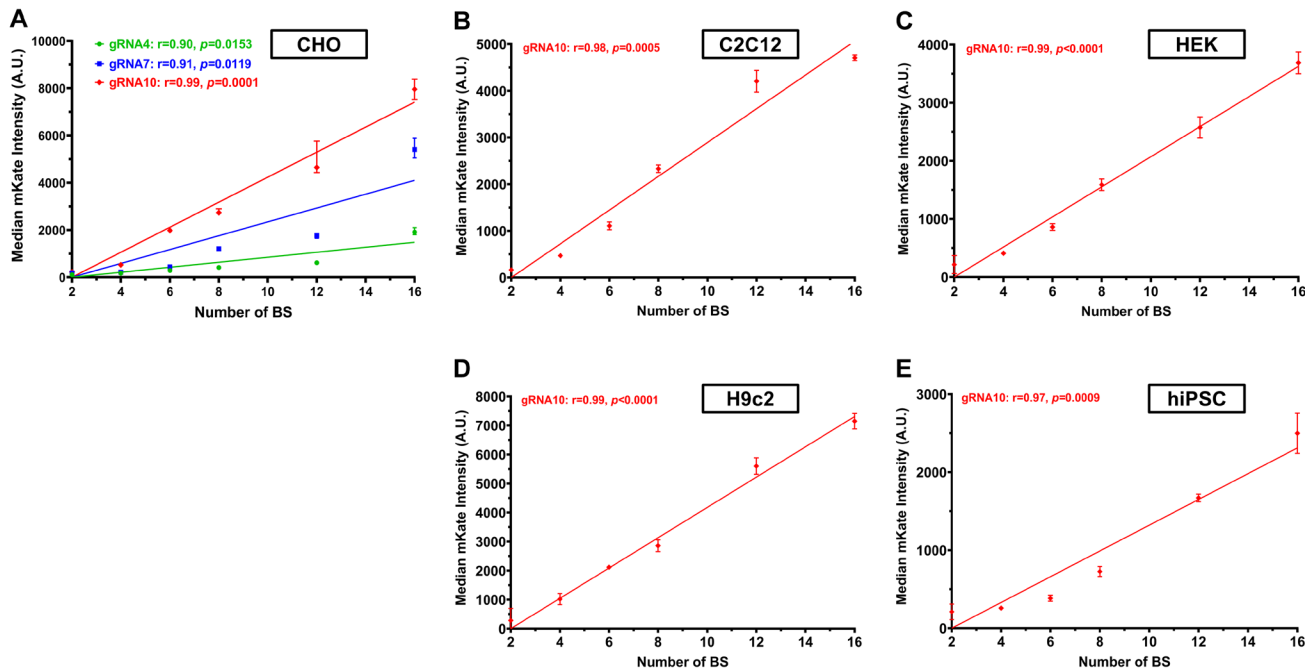

1234

1235

**Supplemental Figure 5. Correlation between the number of gRNA BS in the synthetic operator and the gene expression level.** Based on the quantitative results from flow cytometry analyses presented in **Figure 2**, we performed Pearson correlation analysis to reveal the relationship between the number of gRNA BS in each synthetic operator of the three gRNA series and its target gene expression level. **(A)** In CHO-K1 cells, the gRNA4 series had the Pearson correlation coefficient ( $r$ )=0.90 ( $R^2=0.80$ ,  $p=0.0153$ ); the gRNA7 series had  $r=0.91$  ( $R^2=0.83$ ,  $p=0.0119$ ); and the gRNA10 series had  $r=0.99$  ( $R^2=0.98$ ,  $p=0.0001$ ). **(B-E)** For the gRNA10 series,  $r=0.98$  ( $R^2=0.96$ ,  $p=0.0005$ ) in mouse C2C12 myoblasts **(B)**,  $r=0.99$  ( $R^2=0.99$ ,  $p<0.0001$ ) in human HEK293T cells **(C)**,  $r=0.99$  ( $R^2=0.99$ ,  $p<0.0001$ ) in rat H9C2 cardiomyoblast cells **(D)**, and  $r=0.98$  ( $R^2=0.95$ ,  $p=0.0009$ ) in hiPSC cells **(E)**. Simple linear regression was performed to plot the graphs. Data represent the mean  $\pm$  SD ( $n = 3$ ).

1246

1247

1248

1249

1250

1251

1252

1253

1254

1255

1256

1257

1258



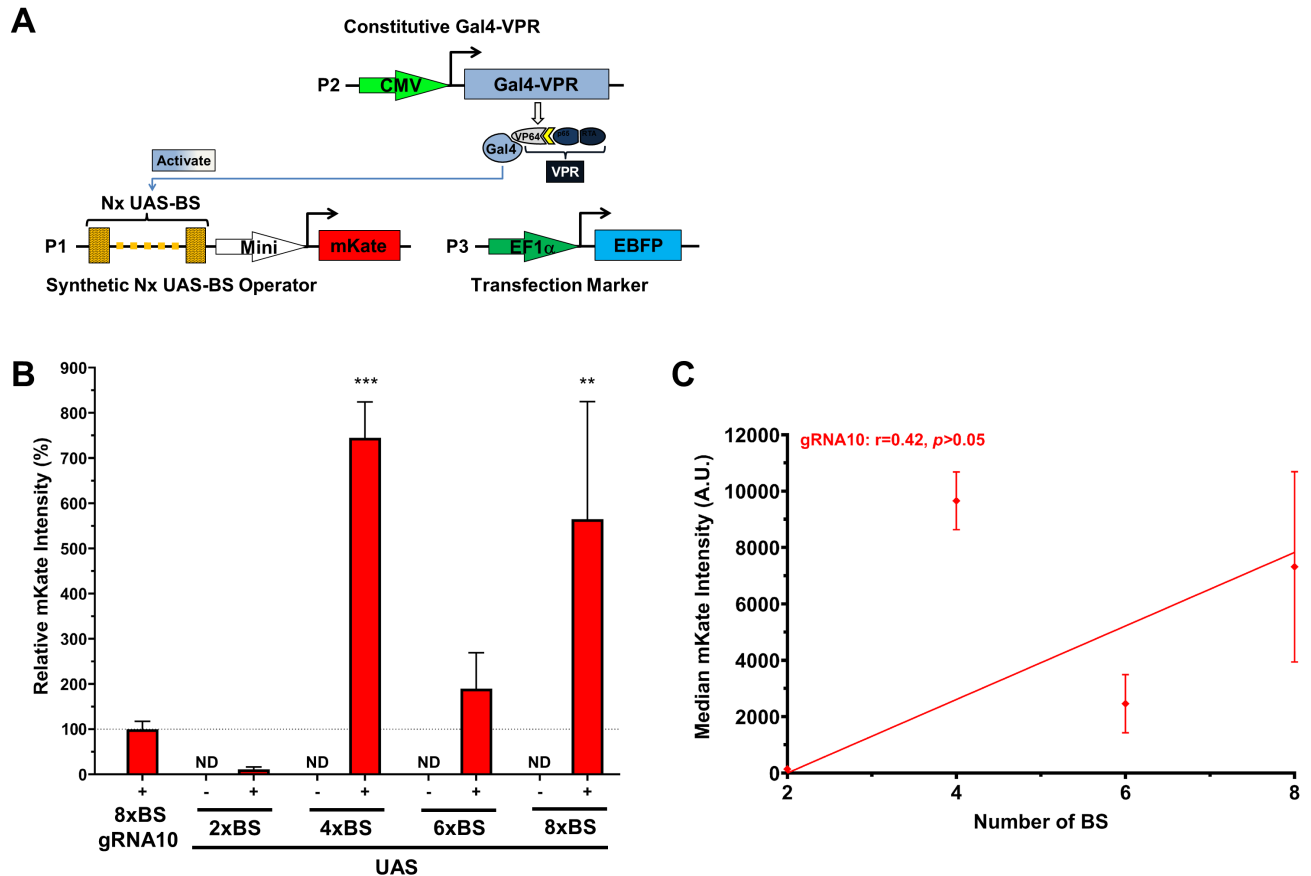

1259

1260

**Supplemental Figure 6. Gene expression controlled by Gal4-VPR/UAS system in CHO-K1 cells.**

1261

(A) A schematic illustration of three plasmids used to transiently transfect CHO-K1 cells: plasmid #1

1262

(P1) encoding the synthetic operator with 2-8x of UAS-BS to drive mKate expression; plasmid #2 (P2)

1263

constitutively expressing a Gal4-VPR gene; and plasmid #3 (P3) constitutively expressing the

1264

transfection marker (EBFP). (B) The mKate signal intensities of representative circuits with 2x-8x

1265

UAS-BS. Experimental groups (+), represented by red solid bars, were transfected with three

1266

plasmids (P1-P3). Control groups (-), represented by paired red hollow bars, were transfected without

1267

P2 (only P1 and P3) to detect baseline UAS operator leakage. (C) Correlation between the number of

1268

UAS-BS in the synthetic operator and the gene expression level. Data represent the mean  $\pm$  SD ( $n$

1269

= 3) (one-way ANOVA with multiple comparisons corrected by Dunnett test; \*\* $p<0.01$ , \*\*\* $p<0.001$ ; ND:

1270

not detected).

1271

1272

1273

1274

1275

1276

1277

1278

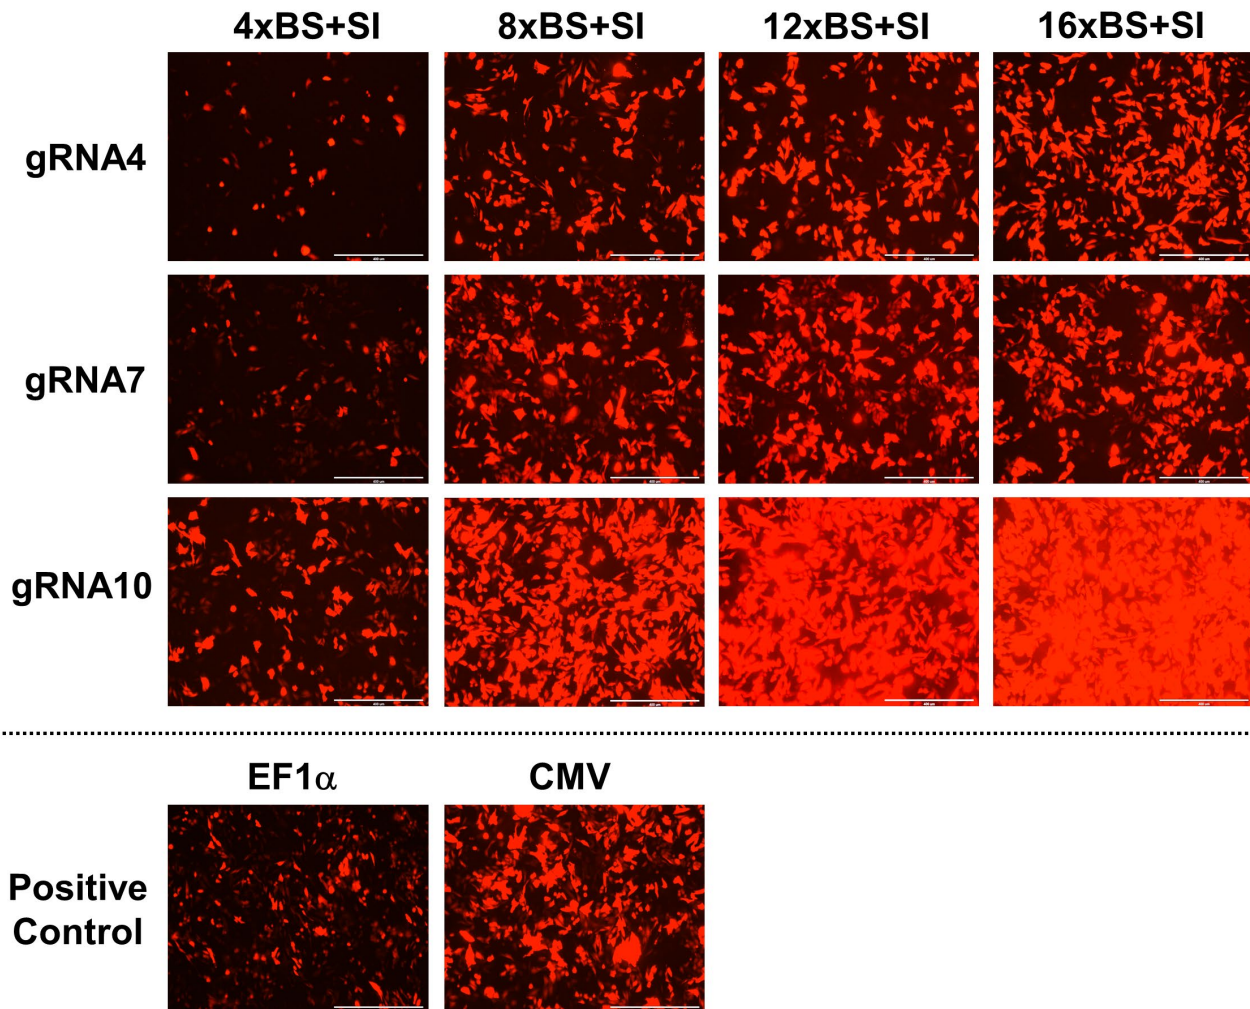

1279  
1280  
1281  
1282  
1283  
1284  
1285  
1286  
1287  
1288  
1289  
1290  
1291  
1292  
1293  
1294

**Supplemental Figure 7. Comparison of gene expression levels with the addition of a synthetic intron (SI) in 4 distinct synthetic operators in three gRNA series.** CHO-K1 cells were transfected as illustrated in **Figures 1C** and **3D**, with each gRNA expressed constitutively from P1. mKate was expressed by each synthetic operator (P2) with the presence of an SI at the 5' UTR of the mKate gene. mKate expression driven by EF1 $\alpha$  or CMV promoters served as positive controls. Representative fluorescent images revealed marked increases in mKate expression with the addition of the SI in 4 different synthetic operators of each gRNA series at 48 hours post-transfection. The increment was particularly noteworthy in the gRNA10 series when compared with mKate signals expressed by the same synthetic operators without the SI (data shown in **Supplemental Figure 4**).

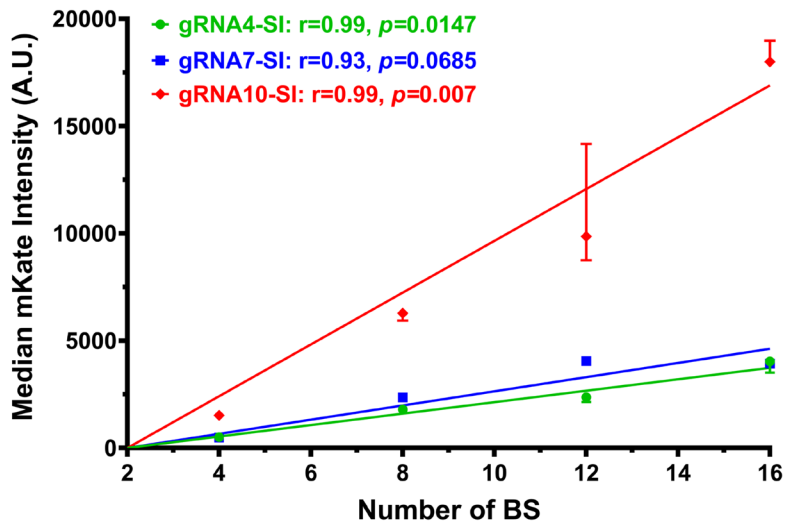

1295

1296 **Supplemental Figure 8. Correlation between the number of gRNA BS and the gene expression**  
1297 **level with the addition of a synthetic intron (SI).** Pearson correlation analysis uncovered the  
1298 relationship between the number of gRNA BS in the synthetic operator and the associated gene  
1299 expression level with the presence of an SI at the 5' UTR of the target gene. The gRNA4-SI series  
1300 had the Pearson correlation coefficient ( $r$ )=0.99 ( $R^2$ =0.97,  $p$ =0.0147); the gRNA7-SI series had  $r$ =0.93  
1301 ( $R^2$ =0.87,  $p$ =0.0685); and the gRNA10-SI series had  $r$ =0.99 ( $R^2$ =0.99,  $p$ =0.007). Simple linear  
1302 regression was performed to plot the graph. Data represent the mean  $\pm$  SD ( $n = 3$ ).

1303

1304

1305

1306

1307

1308

1309

1310

1311

1312

1313

1314

1315

1316

1317

1318

1319

1320

1321

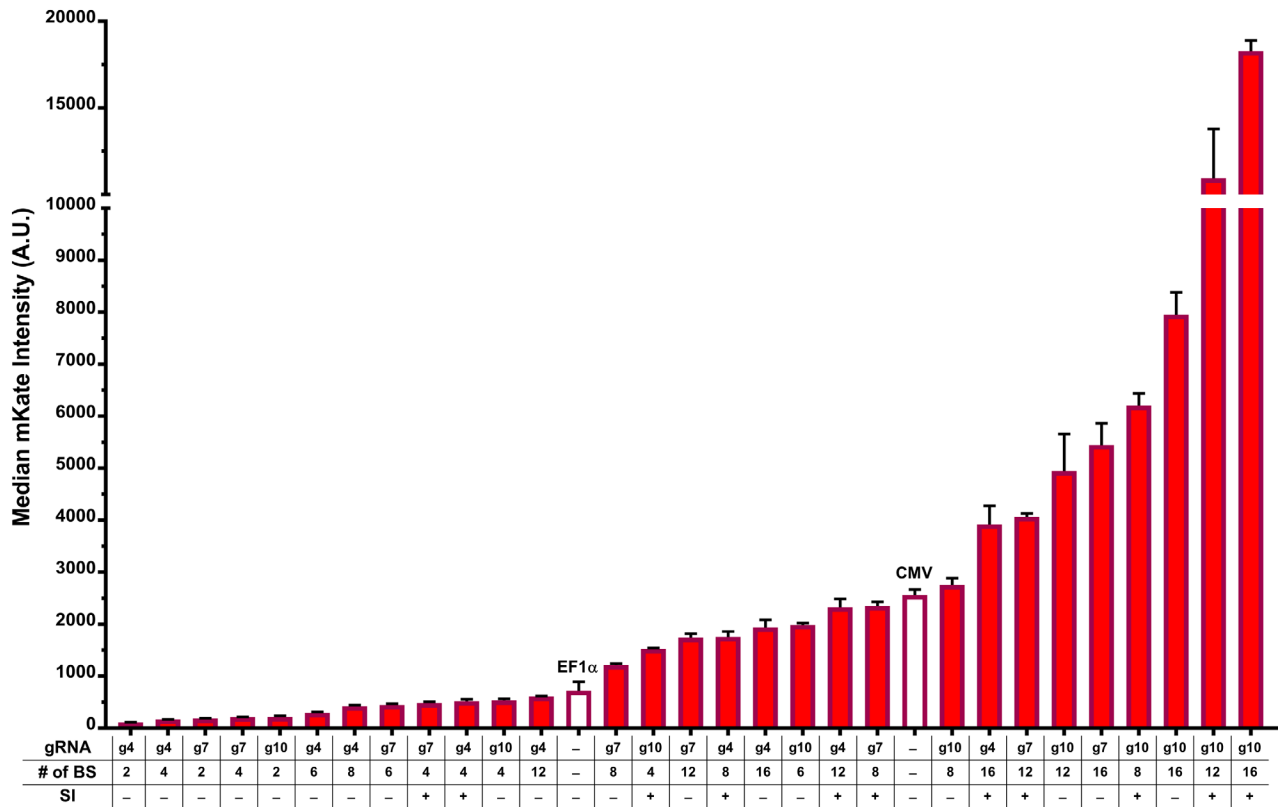

1322

1323

**Supplemental Figure 9. Summary of construct compositions and corresponding gene expression levels.** Compositions and gene expression levels of constructs from gRNA4 (g4), gRNA7 (g7), and gRNA10 (g10) series that were tested episomally, with or without the synthetic intron (SI). EF1 $\alpha$  and CMV promoter controls are represented by empty bars. Data represent the mean  $\pm$  SD (n = 3).

1328

1329

1330

1331

1332

1333

1334

1335

1336

1337

1338

1339

1340

1341

1342

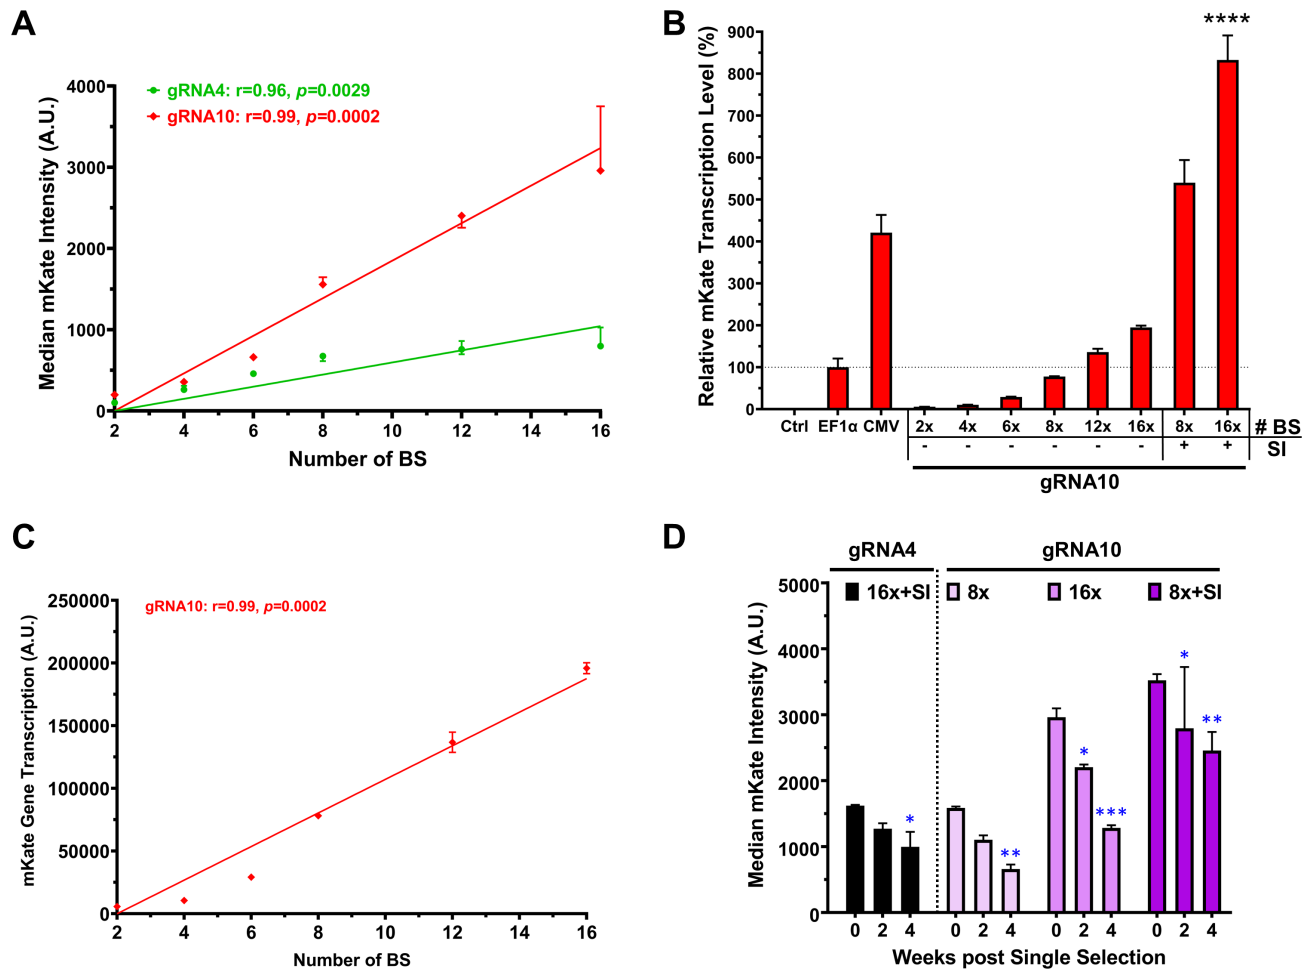

1343

1344

**Supplemental Figure 10. Analyses of chromosomally integrated crisprTF promoter circuits in**

1345

**SLP-CHO cells. (A)** Pearson correlation analysis showed the relationship between the number of

1346

gRNA BS in the synthetic operator and the associated gene expression level when gene circuits were

1347

chromosomally integrated. The gRNA4 series had the Pearson correlation coefficient ( $r=0.96$

1348

( $R^2=0.91$ ,  $p=0.0029$ ), and the gRNA10 series had  $r=0.99$  ( $R^2=0.98$ ,  $p=0.0002$ ). Simple linear

1349

regression was performed to plot the graph. **(B)** RT-qPCR analysis showing mKate transcription of

1350

chromosomally integrated crisprTF promoter circuits relative to the integrated EF1 $\alpha$  control (one-way

1351

ANOVA with multiple comparisons corrected by Dunnett test). **(C)** Correlation analysis between the

1352

number of gRNA10 BS and mKate transcription levels showed  $r=0.99$  ( $R^2=0.98$ ,  $p=0.0002$ ). **(D)** The

1353

mKate expression levels of representative circuit integrants from gRNA4 (16x BS with SI) and

1354

gRNA10 (8x and 16x BS without SI, and 8x BS with SI) series over the course of 4 weeks following

1355

single antibiotic selection. Data represent the mean  $\pm$  SD ( $n = 3$ ) (two-way ANOVA with multiple

1356

comparisons corrected by Dunnett test; \* $p \leq 0.05$ , \*\* $p \leq 0.01$ , \*\*\* $p \leq 0.001$ , \*\*\*\* $p \leq 0.0001$ ).

1357

1358

1359

1360

## A Adherent HEK293 Cells with Single Landing Pad (sLP)

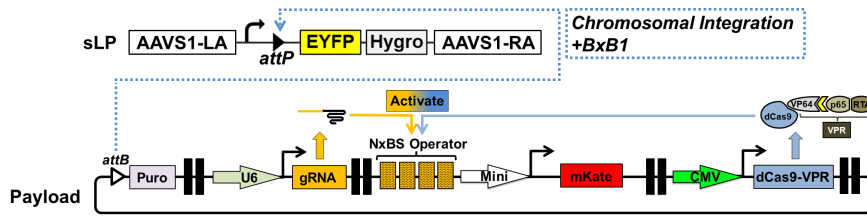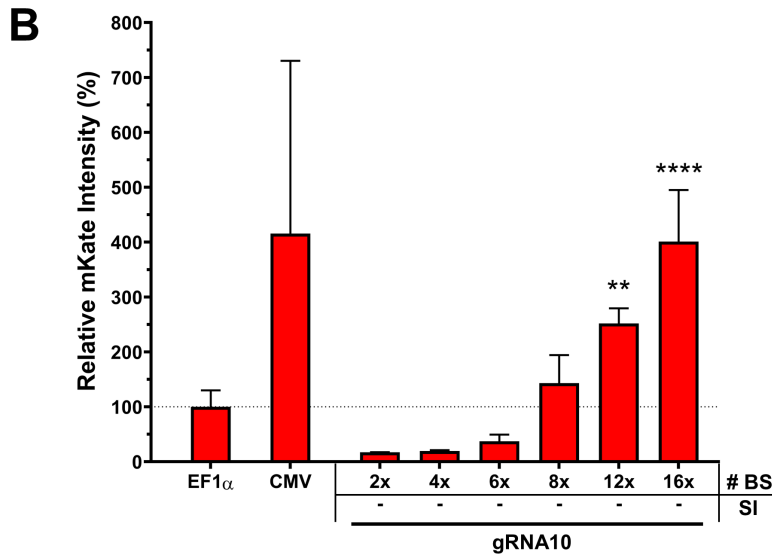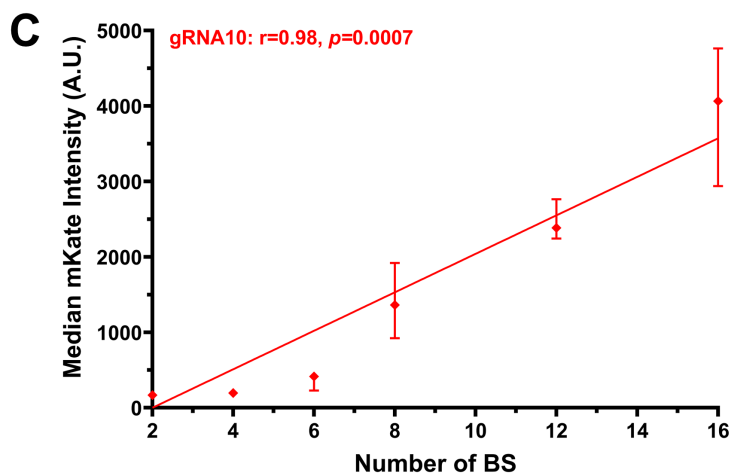

1361

1362

1363

1364

1365

1366

1367

1368

1369

1370

**Supplemental Figure 11. Genomic integration and precision gene expression in HEK293 landing pad cells. (A)** A schematic illustration of an integration gene circuit and BxB1 recombinase-mediated, site-specific integration in an engineered, adherent HEK293 cell line with a single landing pad (sLP). Positive integration control circuits had a central TU with an EF1 $\alpha$  or CMV promoter driving mKate expression and two flanking dummy TUs with no gene expression in the same architecture. **(B)** The mKate signal intensities of the chromosomally integrated payload circuits in sLP-HEK293 cells relative to the integrated EF1 $\alpha$  control circuit at 1 week post-selection. **(C)** Correlation between the number of gRNA10 BS and mKate expression levels. Data represent the mean  $\pm$  SD ( $n = 3$ ) (one-way ANOVA with multiple comparisons corrected by Dunnett test; \*\* $p < 0.01$ , \*\*\*\* $p < 0.0001$ ).

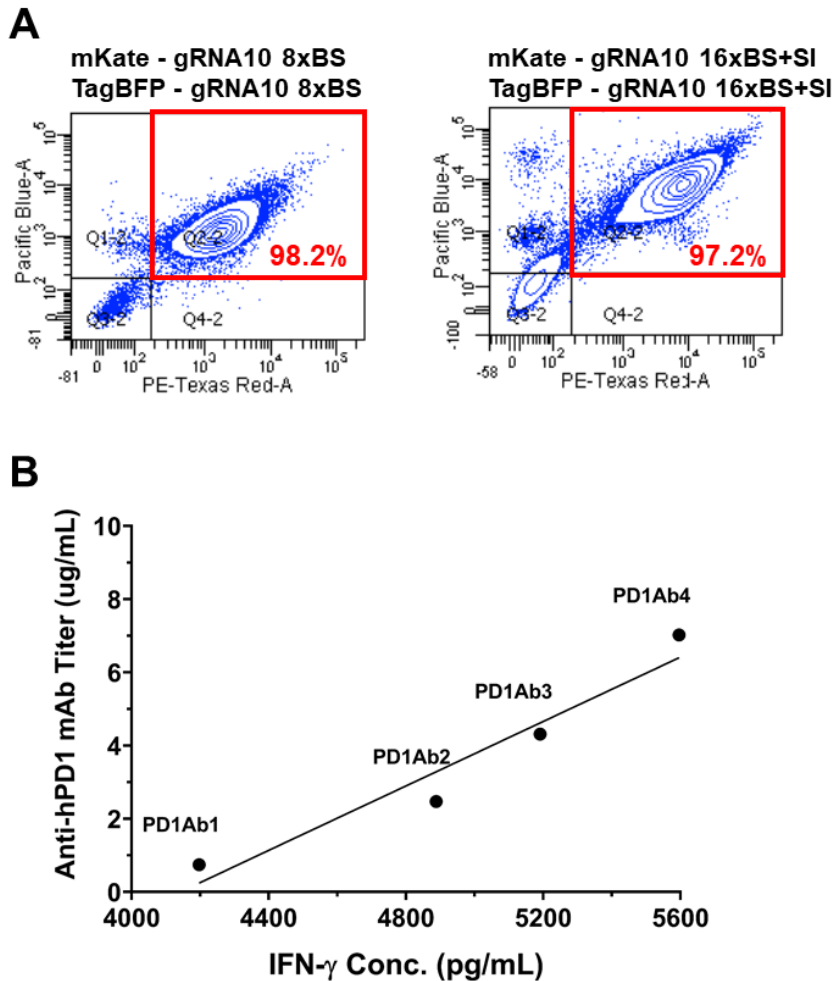

1371

1372

1373

1374

1375

1376

1377

1378

1379

1380

1381

1382

1383

1384

1385

1386

1387

1388

**Supplemental Figure 12. Genomic integration and precision control of target gene expression in the CHO cells engineered with a double landing pad (dLP).** (A) Precision control of expression levels of two target genes in integrated dLP-CHO cells. Representative FACS dot-plots showing the mKate (x-axis, PE-Texas Red) and TagBFP (y-axis, Pacific Blue) signals in dLP-CHO cells integrated with either 8x BS without SI (left panel) or 16x BS with SI (right panel) control circuit. (B) Correlation between IFN- $\gamma$  production and the anti-hPD1 titer before the start of co-culturing. Pearson correlation analysis revealed the relationship between IFN- $\gamma$  production and the anti-hPD1 titer in the dLP-CHO cell cultures pre-seeded for 2 days prior to the start of co-culturing (n=3). Pearson correlation coefficient (r)=0.97 ( $R^2=0.94$ ,  $p=0.0327$ ).

1389

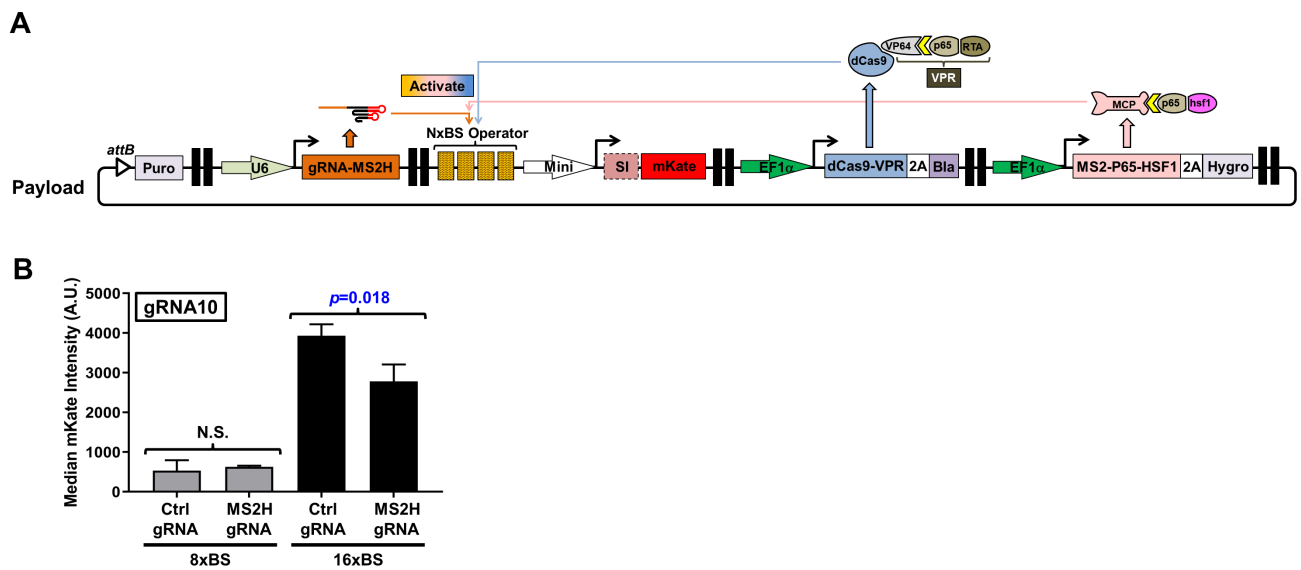

1390

1391

**Supplemental Figure 13. Investigation of the synergistic effect between SAM and dCas-VPR at**

1392

**the chromosomal level. (A)** A schematic illustration of the gene circuit for chromosomal integration

1393

in sLP-CHO cells. The circuit constitutively co-expressed SAM, including gRNA with hairpins and

1394

MCP-p65-hsf1, and dCas9-VPR as well as 3 selection marker genes, including the 5' flanking

1395

puromycin and the 3' flanking blasticidin (associated with dCas9-VPR gene using a self-cleaving P2A

1396

peptide) and hygromycin (associated with MCP-p65-hsf1 gene using P2A). **(B)** sLP-CHO cells were

1397

transfected with the payload circuit and a BxB1-expressing plasmid. After the triple-antibiotic selection,

1398

mKate expression levels assessed by flow cytometry showed no synergistic effect between SAM and

1399

dCas-VPR with the chromosomally integrated gRNA10 8xBS operator ( $p>0.05$ ). mKate signals

1400

significantly decreased when SAM and dCas-VPR were acting together with the gRNA10 16xBS

1401

operator ( $p=0.018$ ). Data represent the mean  $\pm$  SD ( $n = 3$ ) (two-tailed paired Student's *t*-test).

1402

1403

1404

1405

1406

1407

1408

1409

1410

1411

1412

1413

1414

1415



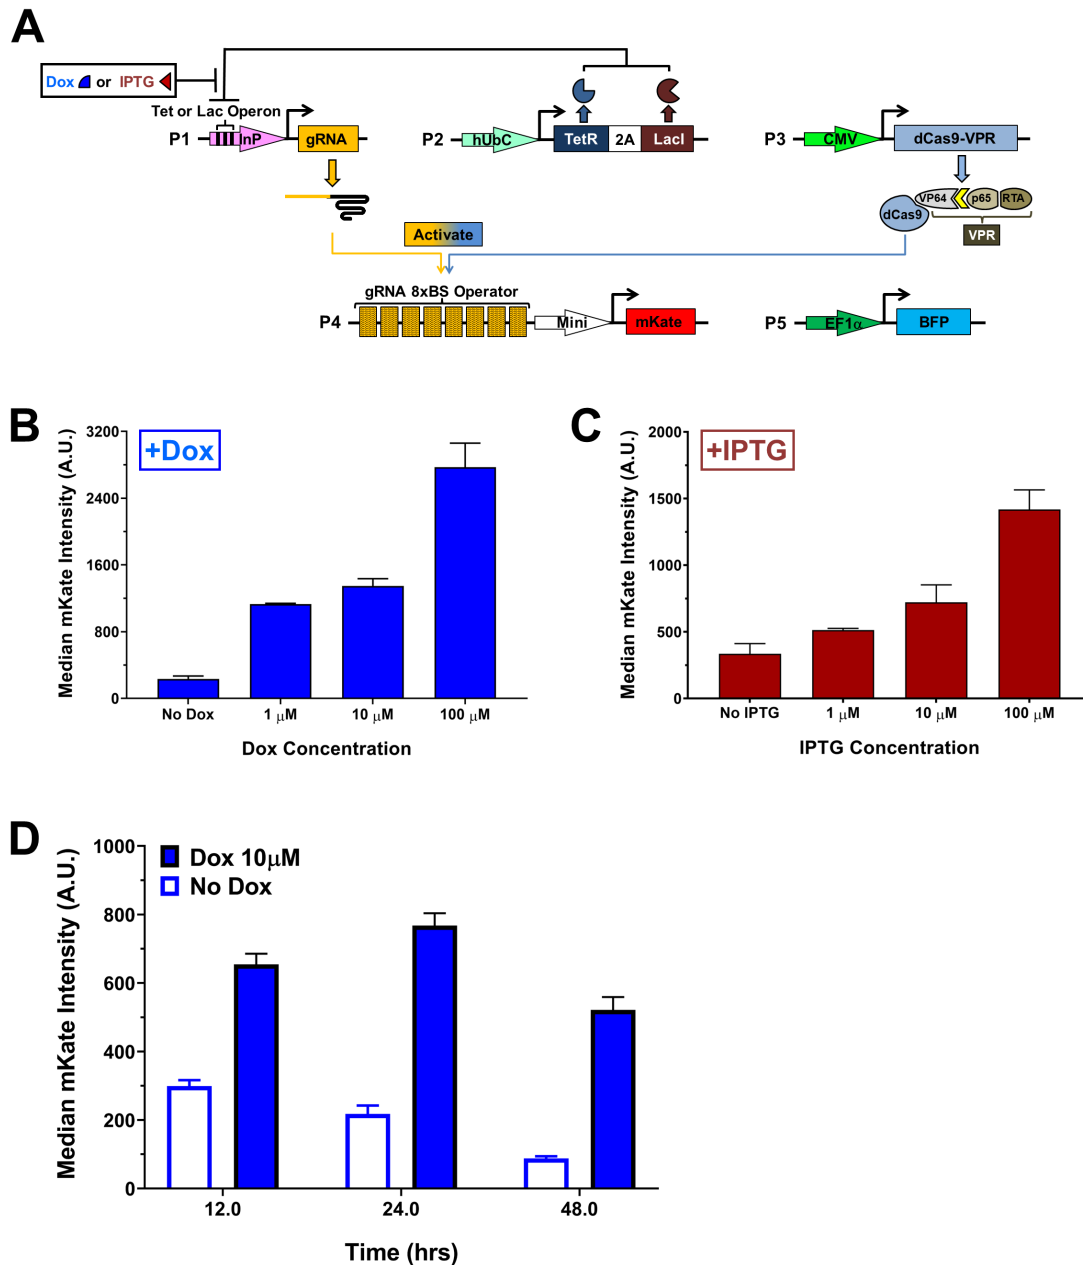

**Supplemental Figure 14. crisprTF promoters with small molecule-inducible gRNA expression.**

(A) To equip the crisprTF promoter system with an added tier of controllability, we developed inducible switches with doxycycline (Dox)-inducible or isopropyl  $\beta$ -D-1-thiogalactopyranoside (IPTG)-inducible gRNA expression. Either a Tet or a Lac operon was custom imbedded into a RNA polymerase III (Pol III) promoter driving gRNA10 expression to render inducibility. Without an appropriate small molecule inducer (Dox or IPTG), the Tet repressor or Lac inhibitor (both constitutively expressed from a single plasmid using a self-cleaving P2A peptide) bound to the Tet or Lac operon, respectively, and repressed gRNA expression. In the presence of Dox or IPTG, the Tet repressor or Lac inhibitor did not bind to the respective operon, permitting gRNA10 transcription. (B) Titration analysis of the Dox-inducible gRNA10 expression with its 8x BS synthetic promoter unveiled incrementally increased mKate expression with increased Dox concentration; the highest expression level was seen with 100

1428  $\mu\text{M}$  Dox. **(C)** Titration analysis of the IPTG-inducible gRNA10 expression with its 8x BS synthetic  
1429 promoter revealed incrementally increased mKate expression with increased IPTG concentration; the  
1430 highest expression level was seen with 100  $\mu\text{M}$  IPTG. **(D)** mKate expression kinetics in the presence  
1431 (solid blue bars) or absence (empty blue bars) of 10  $\mu\text{M}$  Dox. Data represent the mean  $\pm$  SD ( $n = 3$ ).
